# Supplementary material for: A Comprehensive Global Modelling Assessment of Nitrate Heterogeneous Formation on Desert Dust
Source: Copernicus journal article supplement (doi:10.5194/egusphere-2024-2310), 2024-09-16
Supplement: Supplementary file 2 [file egusphere-2024-2310-supplement.pdf]

*Supplement of*  
**A Comprehensive Global Modelling Assessment of Nitrate  
Heterogeneous Formation on Desert Dust**

Rubén Soussé-Villa<sup>1</sup>, Oriol Jorba<sup>1</sup>, María Gonçalves Ageitos<sup>1</sup>, Dene Bowdalo<sup>1</sup>, Marc Guevara<sup>1</sup>, and Carlos Pérez García-Pando<sup>1,2</sup>

<sup>1</sup>Barcelona Supercomputing Center, Barcelona, Spain

<sup>2</sup>Catalan Institution for Research and Advanced Studies (ICREA), Barcelona, Spain

**Correspondence:** Rubén Soussé (ruben.sousse@bsc.es), Oriol Jorba (oriol.jorba@bsc)

## S1 Model emissions, size bins and alkalinity calculations

**Table S1.** Total emissions (anthropogenic, biogenic and biomass burning) for 2018 used in this study.

| <b>Species</b>  | <b>Emission (Tgy-1)</b> |
|-----------------|-------------------------|
| <b>NO</b>       | 75.93                   |
| <b>NO2</b>      | 17.86                   |
| <b>HONO</b>     | 0.51                    |
| <b>NH3</b>      | 61.81                   |
| <b>SO2</b>      | 104.40                  |
| <b>PM2.5SO4</b> | 0.53                    |



**Table S2:** Density, volumetric radius, effective radius, pm2.5 and pm10 fractions of each bin of the studied species

| <b>DUST</b>        |              |              |              |              |              |              |              |              |              |
|--------------------|--------------|--------------|--------------|--------------|--------------|--------------|--------------|--------------|--------------|
|                    | <b>units</b> | <b>bin 1</b> | <b>bin 2</b> | <b>bin 3</b> | <b>bin 4</b> | <b>bin 5</b> | <b>bin 6</b> | <b>bin 7</b> | <b>bin 8</b> |
| <b>Density</b>     | kgm-3        | 2500         | 2500         | 2500         | 2500         | 2650         | 2650         | 2650         | 2650         |
| <b>Radius vol.</b> | $\mu m$      | 0.15         | 0.25         | 0.47         | 0.8          | 1.36         | 2.29         | 3.93         | 7.24         |
| <b>Radius eff.</b> | $\mu m$      | 0.15         | 0.25         | 0.45         | 0.78         | 1.32         | 2.24         | 3.80         | 7.11         |
| <b>PM2.5 frac.</b> |              | 1            | 1            | 1            | 1            | 0.38         | 0            | 0            | 0            |
| <b>PM10 frac.</b>  |              | 1            | 1            | 1            | 1            | 1            | 1            | 0.87         | 0            |
| <b>SEA_SALT</b>    |              |              |              |              |              |              |              |              |              |
|                    | <b>units</b> | <b>bin 1</b> | <b>bin 2</b> | <b>bin 3</b> | <b>bin 4</b> | <b>bin 5</b> | <b>bin 6</b> | <b>bin 7</b> | <b>bin 8</b> |
| <b>Density</b>     | kgm-3        | 2160         | 2160         | 2160         | 2160         | 2160         | 2160         | 2160         | 2160         |
| <b>Radius vol.</b> | $\mu m$      | 0.15         | 0.25         | 0.47         | 0.81         | 1.40         | 2.37         | 4.30         | 9.23         |
| <b>Radius eff.</b> | $\mu m$      | 0.14         | 0.24         | 0.45         | 0.79         | 1.36         | 2.32         | 4.13         | 8.64         |
| <b>PM2.5 frac.</b> |              | 1            | 1            | 1            | 1            | 0.32         | 0            | 0            | 0            |
| <b>PM10 frac.</b>  |              | 1            | 1            | 1            | 1            | 1            | 1            | 0.75         | 0            |
| <b>NO3</b>         |              |              |              |              |              |              |              |              |              |
|                    | <b>units</b> | <b>bin 1</b> | <b>bin 2</b> |              |              |              |              |              |              |
| <b>Density</b>     | kgm-3        | 1700         | 2380         |              |              |              |              |              |              |
| <b>Radius vol.</b> | $\mu m$      | 0.35         | 2.23         |              |              |              |              |              |              |
| <b>Radius eff.</b> | $\mu m$      | 0.24         | 1.79         |              |              |              |              |              |              |
| <b>PM2.5 frac.</b> |              | 1            | 0.2          |              |              |              |              |              |              |
| <b>PM10 frac.</b>  |              | 1            | 1            |              |              |              |              |              |              |
| <b>NH4</b>         |              |              |              |              |              |              |              |              |              |
|                    | <b>units</b> | <b>bin 1</b> | <b>bin 2</b> |              |              |              |              |              |              |
| <b>Density</b>     | kgm-3        | 1700         | 2380         |              |              |              |              |              |              |
| <b>Radius vol.</b> | $\mu m$      | 0.35         | 2.23         |              |              |              |              |              |              |
| <b>Radius eff.</b> | $\mu m$      | 0.24         | 1.79         |              |              |              |              |              |              |
| <b>PM2.5 frac.</b> |              | 1            | 0.2          |              |              |              |              |              |              |
| <b>PM10 frac.</b>  |              | 1            | 1            |              |              |              |              |              |              |
| <b>SO4</b>         |              |              |              |              |              |              |              |              |              |
|                    | <b>units</b> | <b>bin 1</b> | <b>bin 2</b> |              |              |              |              |              |              |
| <b>Density</b>     | kgm-3        | 1700         | 2380         |              |              |              |              |              |              |
| <b>Radius vol.</b> | $\mu m$      | 0.35         | 2.23         |              |              |              |              |              |              |
| <b>Radius eff.</b> | $\mu m$      | 0.24         | 1.79         |              |              |              |              |              |              |
| <b>PM2.5 frac.</b> |              | 1            | 0.2          |              |              |              |              |              |              |
| <b>PM10 frac.</b>  |              | 1            | 1            |              |              |              |              |              |              |

| Mineral                | Bin 1  | Bin 2  | Bin 3  | Bin 4  | Bin 5  | Bin 6  | Bin 7  | Bin 8  | Soluble in water? | Soluble in acids? | Assumed reactive? | Notes/References |
|------------------------|--------|--------|--------|--------|--------|--------|--------|--------|-------------------|-------------------|-------------------|------------------|
| <b>Illite</b>          | 8.5E-5 | 4.1E-4 | 3.1E-3 | 8.8E-3 | 2.2E-2 | 3.2E-2 | 5.5E-2 | 1.4E-2 | no                | yes               | yes               | 1                |
| <b>Montmorillonite</b> | 6.2E-5 | 3.0E-4 | 2.2E-3 | 6.4E-3 | 1.6E-2 | 2.3E-2 | 4.0E-2 | 1.0E-2 | -                 | yes               | yes               | 2                |
| <b>Kaolinite</b>       | 7.8E-5 | 3.7E-4 | 2.8E-3 | 8.0E-3 | 2.0E-2 | 2.9E-2 | 5.0E-2 | 1.3E-2 | no                | yes               | no                | 3                |
| <b>Chlorite</b>        | 1.2E-5 | 5.6E-5 | 4.2E-4 | 1.2E-3 | 4.8E-3 | 1.1E-2 | 2.6E-2 | 7.9E-3 | no                | -                 | no                | 4                |
| <b>Vermiculite</b>     | 7.9E-6 | 3.8E-5 | 2.8E-4 | 8.1E-4 | 2.1E-3 | 2.9E-3 | 5.1E-3 | 1.3E-3 | no                | no                | no                | 5                |
| <b>Feldspar</b>        | 3.4E-6 | 1.6E-5 | 1.2E-4 | 3.5E-4 | 6.3E-3 | 2.2E-2 | 6.0E-2 | 1.9E-2 | no                | yes               | yes               | 6                |
| <b>Quartz</b>          | 1.2E-5 | 5.8E-5 | 4.4E-4 | 1.3E-3 | 1.9E-2 | 6.6E-2 | 1.8E-1 | 5.6E-2 | no                | no                | no                | 7                |
| <b>Calcite</b>         | 3.1E-5 | 1.5E-4 | 1.1E-3 | 3.2E-3 | 1.0E-2 | 1.9E-2 | 3.9E-2 | 1.1E-2 | yes               | yes               | yes               | 8                |
| <b>Hematite</b>        | 3.5E-6 | 1.7E-5 | 1.3E-4 | 3.6E-4 | 9.2E-4 | 1.3E-3 | 2.3E-3 | 5.9E-4 | no                | yes               | no                | 9                |
| <b>Goethite</b>        | 6.2E-6 | 2.9E-5 | 2.2E-4 | 6.3E-4 | 1.8E-3 | 3.1E-3 | 6.2E-3 | 1.8E-3 | no                | -                 | no                | 10               |
| <b>Gypsum</b>          | 4.7E-7 | 2.2E-6 | 1.7E-5 | 4.8E-5 | 1.4E-4 | 2.5E-4 | 5.2E-4 | 1.5E-4 | poor              | yes               | no                | 11               |
| <b>Mica</b>            | 0.0E+0 | 0.0E+0 | 0.0E+0 | 0.0E+0 | 2.7E-3 | 1.0E-2 | 2.8E-2 | 9.0E-3 | no                | no                | no                | 12               |
| <b>Total</b>           | 3.0E-4 | 1.4E-3 | 1.1E-2 | 3.1E-2 | 1.1E-1 | 2.2E-1 | 4.9E-1 | 1.5E-1 |                   |                   |                   |                  |

4

**Table S3.** Globally-averaged mineral composition for each bin assumed from Journet et al. 2014 mineral database. References:

1. Assumed reactive because relatively soluble in acids Webmineral (2008f)
2. Assumed reactive because relatively soluble in acids Nutting (1941, 1932)
3. Assumed nonreactive because predominantly containing Al and Si. Yang (2008)
4. Assumed nonreactive because not soluble in water. Britannica, The Editors of Encyclopaedia (2018); Mindat.org (a)
5. Assumed nonreactive because not soluble. Huggett (2015); Schulze (2005); Bleam (2017)
6. Assumed reactive because relatively soluble in acids Blum (1994); Mindat.org (b)
7. Assumed nonreactive because not soluble. Usher et al. (2003)
8. Usher et al. (2003); Krueger et al. (2004); Hodzic et al. (2006)
9. Assumed nonreactive because iron is not considered in ISORROPIA-II. National Center for Biotechnology Information (2024a); Weast (1980)
10. Assumed nonreactive because not soluble, although lacking information if soluble in acids. Essington et al. (2005); National Center for Biotechnology Information. PubChem Compound Database (2024b)
11. Zhang and Muhammed (1989); National Center for Biotechnology Information. PubChem Compound Database (2024a); Krueger et al. (2004); Hodzic et al. (2006)
12. National Center for Biotechnology Information (2024b)

| Mineral                  | Mineral Mw (g/mol) | Soluble element | Element Mw (g/mol) | Element fraction | Bin 1 | Bin 2 | Bin 3 | Bin 4 | Total fine | Bin 5 | Bin 6 | Bin 7 | Bin 8 | Total coarse | Total | References |
|--------------------------|--------------------|-----------------|--------------------|------------------|-------|-------|-------|-------|------------|-------|-------|-------|-------|--------------|-------|------------|
| Illite                   | 389.34             | K               | 39.10              | 0.10             | 2.84% | 2.84% | 2.84% | 2.84% | 2.84%      | 2.10% | 1.45% | 1.13% | 0.99% | 1.41%        | 2.20% | 1          |
|                          | 389.34             | Mg              | 24.31              | 0.06             | 1.76% | 1.76% | 1.76% | 1.76% | 1.76%      | 1.30% | 0.90% | 0.70% | 0.62% | 0.88%        | 1.37% | 1          |
| Montmorillonite          | 549.07             | Ca              | 40.08              | 0.07             | 1.50% | 1.50% | 1.50% | 1.50% | 1.50%      | 1.11% | 0.76% | 0.59% | 0.52% | 0.75%        | 1.16% | 2          |
|                          | 549.07             | Na              | 22.99              | 0.04             | 0.86% | 0.86% | 0.86% | 0.86% | 0.86%      | 0.63% | 0.44% | 0.34% | 0.30% | 0.43%        | 0.67% | 2          |
| Feldspar<br>- 1/3 Albite | 263.02             | Na (1/3)        | 22.99              | 0.03             | 0.03% | 0.03% | 0.03% | 0.03% | 0.03%      | 0.16% | 0.27% | 0.32% | 0.35% | 0.27%        | 0.14% | 3          |
|                          | 277.41             | Ca (1/3)        | 40.08              | 0.04             | 0.05% | 0.05% | 0.05% | 0.05% | 0.05%      | 0.26% | 0.44% | 0.53% | 0.57% | 0.45%        | 0.23% | 4          |
| - 1/3 Anorthite          | 278.33             | K (1/3)         | 39.10              | 0.04             | 0.05% | 0.05% | 0.05% | 0.05% | 0.05%      | 0.25% | 0.43% | 0.52% | 0.56% | 0.44%        | 0.22% | 5          |
|                          | 100.09             | Ca              | 40.08              | 0.40             | 4.15% | 4.15% | 4.15% | 4.15% | 4.15%      | 3.76% | 3.41% | 3.23% | 3.16% | 3.39%        | 3.81% | 6          |
| Gypsum                   | 172.20             | Ca              | 40.08              | 0.23             | 0.04% | 0.04% | 0.04% | 0.04% | 0.04%      | 0.03% | 0.03% | 0.02% | 0.02% | 0.03%        | 0.03% | 7          |
| <b>Total Ca</b>          |                    |                 |                    |                  | 5.73% | 5.73% | 5.73% | 5.73% | 5.73%      | 5.15% | 4.64% | 4.39% | 4.28% | 4.61%        | 5.17% |            |
| <b>Total Na</b>          |                    |                 |                    |                  | 0.89% | 0.89% | 0.89% | 0.89% | 0.89%      | 0.79% | 0.71% | 0.66% | 0.65% | 0.70%        | 0.79% |            |
| <b>Total K</b>           |                    |                 |                    |                  | 2.88% | 2.88% | 2.88% | 2.88% | 2.88%      | 2.35% | 1.88% | 1.64% | 1.55% | 1.85%        | 2.37% |            |
| <b>Total Mg</b>          |                    |                 |                    |                  | 1.76% | 1.76% | 1.76% | 1.76% | 1.76%      | 1.30% | 0.90% | 0.70% | 0.62% | 0.88%        | 1.32% |            |

**Table S4.** Size-resolved NVC content from globally-averaged mineralogy of Journet et al. 2014 for those minerals assumed to be soluble in water. References:

1. Webmineral (2008f)
2. Nutting (1941, 1932)
3. Webmineral (2008a)
4. Webmineral (2008b)
5. Webmineral (2008e)
6. Webmineral (2008c); National Center for Biotechnology Information. PubChem Compound Database (2024a)
7. Webmineral (2008d); Hulett and Allen (1902)

| Mineral                | Bin 1   | Bin 2   | Bin 3   | Bin 4   | Bin 5   | Bin 6   | Bin 7   | Bin 8   | Soluble in water? | Soluble in acids? | Assumed reactive? | Notes/References |
|------------------------|---------|---------|---------|---------|---------|---------|---------|---------|-------------------|-------------------|-------------------|------------------|
| <b>Illite</b>          | 1.1E-04 | 5.4E-04 | 4.0E-03 | 1.2E-02 | 2.9E-02 | 4.2E-02 | 7.2E-02 | 1.9E-02 | no                | yes               | yes               | 1                |
| <b>Montmorillonite</b> | 6.4E-05 | 3.0E-04 | 2.3E-03 | 6.5E-03 | 1.7E-02 | 2.4E-02 | 4.1E-02 | 1.1E-02 | -                 | yes               | yes               | 2                |
| <b>Kaolinite</b>       | 7.6E-05 | 3.6E-04 | 2.7E-03 | 7.8E-03 | 2.0E-02 | 2.8E-02 | 4.8E-02 | 1.3E-02 | no                | yes               | no                | 3                |
| <b>Calcite</b>         | 1.3E-05 | 6.3E-05 | 4.7E-04 | 1.4E-03 | 5.2E-03 | 1.2E-02 | 2.7E-02 | 8.0E-03 | yes               | yes               | yes               | 4                |
| <b>Quartz</b>          | 2.0E-05 | 9.7E-05 | 7.3E-04 | 2.1E-03 | 2.4E-02 | 8.0E-02 | 2.1E-01 | 6.7E-02 | no                | no                | no                | 5                |
| <b>Feldspar</b>        | 8.1E-06 | 3.9E-05 | 2.9E-04 | 8.3E-04 | 8.5E-03 | 2.8E-02 | 7.3E-02 | 2.3E-02 | no                | yes               | yes               | 6                |
| <b>Iron Oxide</b>      | 4.6E-06 | 2.2E-05 | 1.6E-04 | 4.7E-04 | 1.6E-03 | 3.3E-03 | 7.3E-03 | 2.2E-03 | -                 | -                 | no                | 7                |
| <b>Gypsum</b>          | 3.4E-06 | 1.6E-05 | 1.2E-04 | 3.5E-04 | 1.3E-03 | 2.8E-03 | 6.3E-03 | 1.9E-03 | poor              | yes               | no                | 8                |
| <b>Total</b>           | 3.0E-04 | 1.4E-03 | 1.1E-02 | 3.1E-02 | 1.1E-01 | 2.2E-01 | 4.9E-01 | 1.4E-01 |                   |                   |                   |                  |

6

**Table S5.** Globally-averaged mineral composition for each bin assumed from Claquin et al. (1999) mineral database. References:

1. Assumed reactive because relatively soluble in acids Webmineral (2008f)
2. Assumed reactive because relatively soluble in acids Nutting (1941, 1932)
3. Assumed nonreactive because predominantly containing Al and Si. Yang (2008)
4. Usher et al. (2003); Krueger et al. (2004); Hodzic et al. (2006)
5. Assumed nonreactive because not soluble. Usher et al. (2003)
6. Assumed reactive because relatively soluble in acids Blum (1994); Mindat.org (b)
7. Assumed nonreactive because iron is not considered in ISORROPIA-II. National Center for Biotechnology Information (2024a); Weast (1980)
8. Zhang and Muhammed (1989); National Center for Biotechnology Information. PubChem Compound Database (2024a); Krueger et al. (2004); Hodzic et al. (2006)

| Mineral                  | Mineral Mw (g/mol) | Soluble element | Element Mw (g/mol) | Element fraction | Bin 1 | Bin 2 | Bin 3 | Bin 4 | Total fine | Bin 5 | Bin 6 | Bin 7 | Bin 8 | Total coarse | Total | References |
|--------------------------|--------------------|-----------------|--------------------|------------------|-------|-------|-------|-------|------------|-------|-------|-------|-------|--------------|-------|------------|
| Illite                   | 389.340            | K               | 39.10              | 0.10             | 3.76% | 3.76% | 3.76% | 3.76% | 3.76%      | 2.78% | 1.92% | 1.49% | 1.31% | 1.88%        | 2.92% | 1          |
|                          | 389.340            | Mg              | 24.31              | 0.06             | 2.34% | 2.34% | 2.34% | 2.34% | 2.34%      | 1.73% | 1.19% | 0.93% | 0.82% | 1.17%        | 1.82% | 1          |
| Montmorillonite          | 549.070            | Ca              | 40.08              | 0.07             | 1.54% | 1.54% | 1.54% | 1.54% | 1.54%      | 1.14% | 0.78% | 0.61% | 0.54% | 0.77%        | 1.20% | 2          |
|                          | 549.070            | Na              | 22.99              | 0.04             | 0.88% | 0.88% | 0.88% | 0.88% | 0.88%      | 0.65% | 0.45% | 0.35% | 0.31% | 0.44%        | 0.69% | 2          |
| Feldspar<br>- 1/3 Albite | 263.020            | Na (1/3)        | 22.99              | 0.03             | 0.07% | 0.07% | 0.07% | 0.07% | 0.07%      | 0.21% | 0.33% | 0.39% | 0.42% | 0.34%        | 0.19% | 3          |
|                          | 277.410            | Ca (1/3)        | 40.08              | 0.04             | 0.12% | 0.12% | 0.12% | 0.12% | 0.12%      | 0.35% | 0.55% | 0.65% | 0.70% | 0.56%        | 0.31% | 4          |
| - 1/3 Anorthite          | 278.330            | K (1/3)         | 39.10              | 0.04             | 0.11% | 0.11% | 0.11% | 0.11% | 0.11%      | 0.34% | 0.54% | 0.63% | 0.68% | 0.55%        | 0.31% | 5          |
|                          | 100.090            | Ca              | 40.08              | 0.40             | 1.76% | 1.76% | 1.76% | 1.76% | 1.76%      | 1.95% | 2.11% | 2.19% | 2.22% | 2.12%        | 1.92% | 6          |
| Gypsum                   | 172.200            | Ca              | 40.08              | 0.23             | 0.26% | 0.26% | 0.26% | 0.26% | 0.26%      | 0.28% | 0.30% | 0.30% | 0.31% | 0.30%        | 0.28% | 7          |
|                          |                    |                 |                    |                  | 3.68% | 3.68% | 3.68% | 3.68% | 3.68%      | 3.71% | 3.74% | 3.76% | 3.76% | 3.74%        | 3.71% |            |
| <b>Total Ca</b>          |                    |                 |                    |                  | 0.95% | 0.95% | 0.95% | 0.95% | 0.95%      | 0.86% | 0.78% | 0.75% | 0.73% | 0.78%        | 0.87% |            |
| <b>Total Na</b>          |                    |                 |                    |                  | 3.87% | 3.87% | 3.87% | 3.87% | 3.87%      | 3.12% | 2.45% | 2.13% | 1.99% | 2.42%        | 3.15% |            |
| <b>Total K</b>           |                    |                 |                    |                  | 2.34% | 2.34% | 2.34% | 2.34% | 2.34%      | 1.73% | 1.19% | 0.93% | 0.82% | 1.17%        | 1.75% |            |
| <b>Total Mg</b>          |                    |                 |                    |                  |       |       |       |       |            |       |       |       |       |              |       |            |

**Table S6.** Size-resolved NVC content from globally-averaged mineralogy of Claquin et al. (1999) for those minerals assumed to be soluble in water. References:

1. Webmineral (2008f)
2. Nutting (1941, 1932)
3. Webmineral (2008a)
4. Webmineral (2008b)
5. Webmineral (2008e)
6. Webmineral (2008c); National Center for Biotechnology Information. PubChem Compound Database (2024a)
7. Webmineral (2008d); Hulett and Allen (1902)



## S2 Spatial distributions

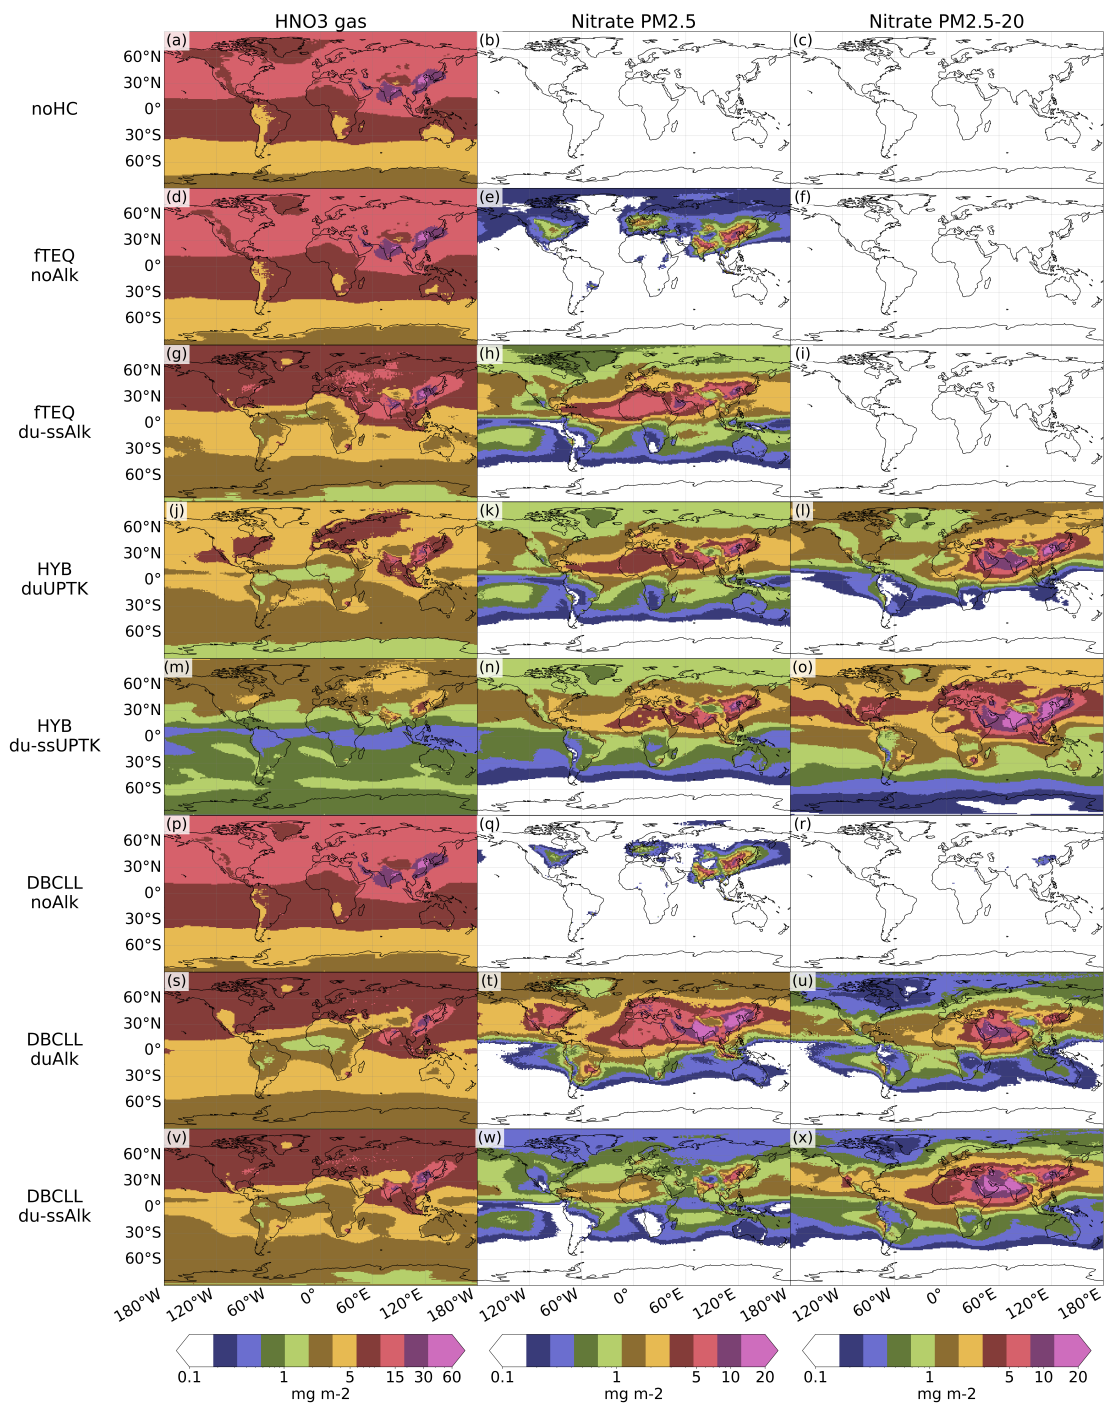

**Figure S1.** Column load ( $\text{mg m}^{-2}$ ) of  $\text{HNO}_3(\text{g})$ , fine and coarse particulate nitrate simulated by the different mechanisms, averaged for 2018.

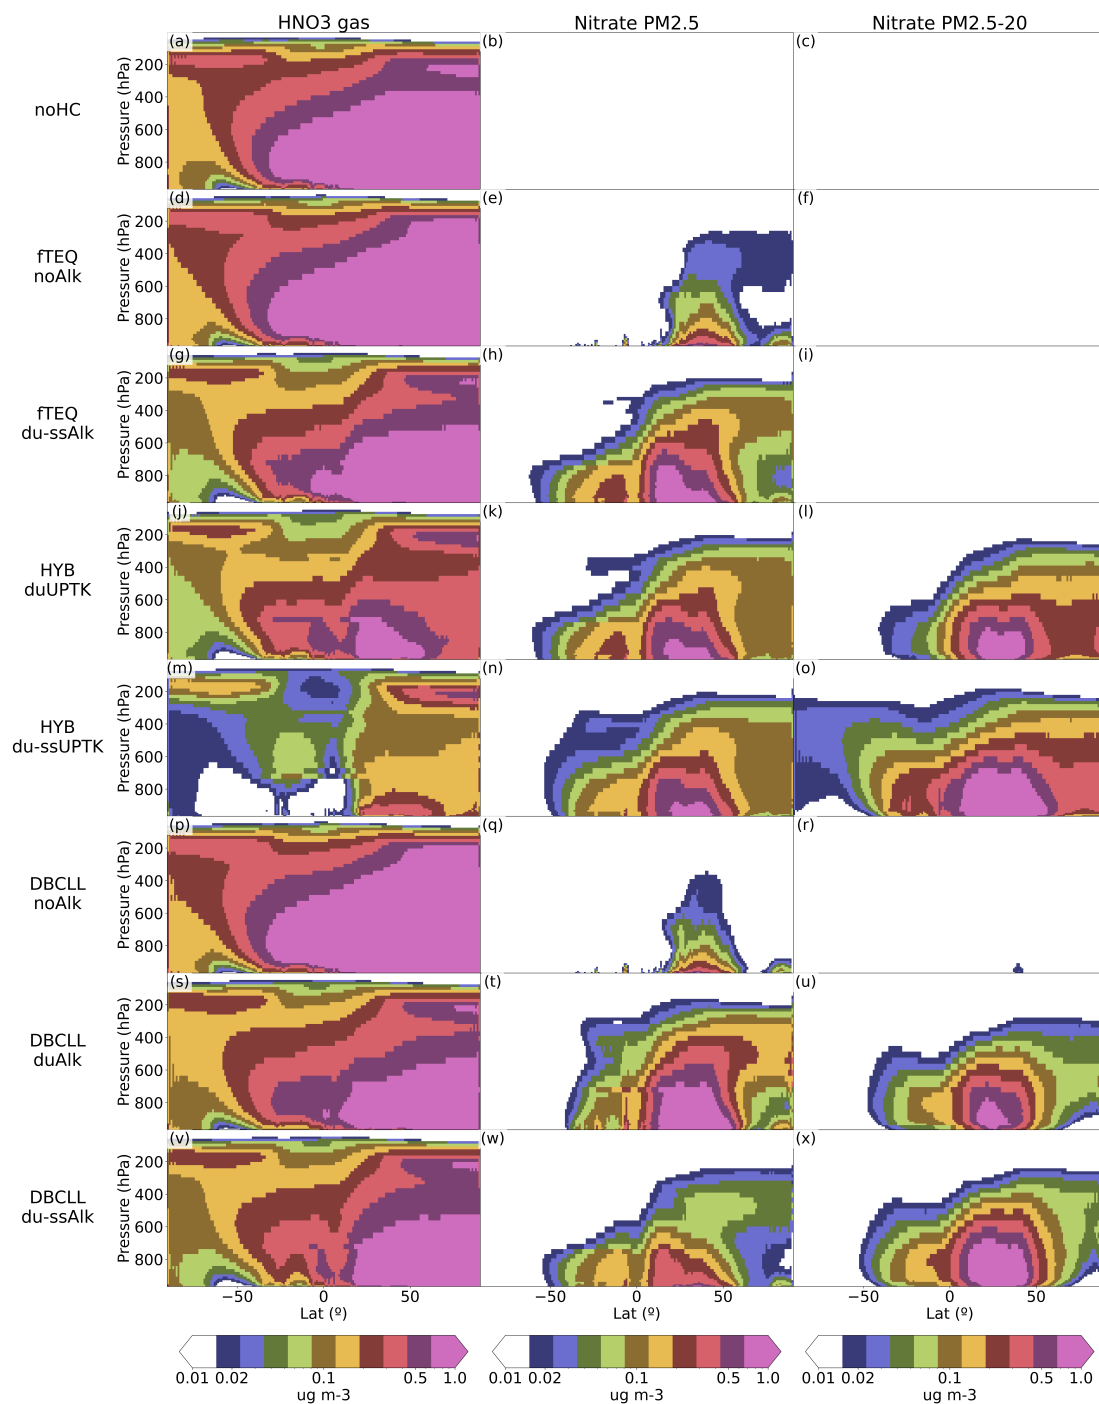

**Figure S2.** Zonal average concentration ( $\mu\text{g m}^{-3}$ ) of HNO<sub>3</sub>, fine and coarse particulate nitrate simulated by the different mechanisms in 2018.



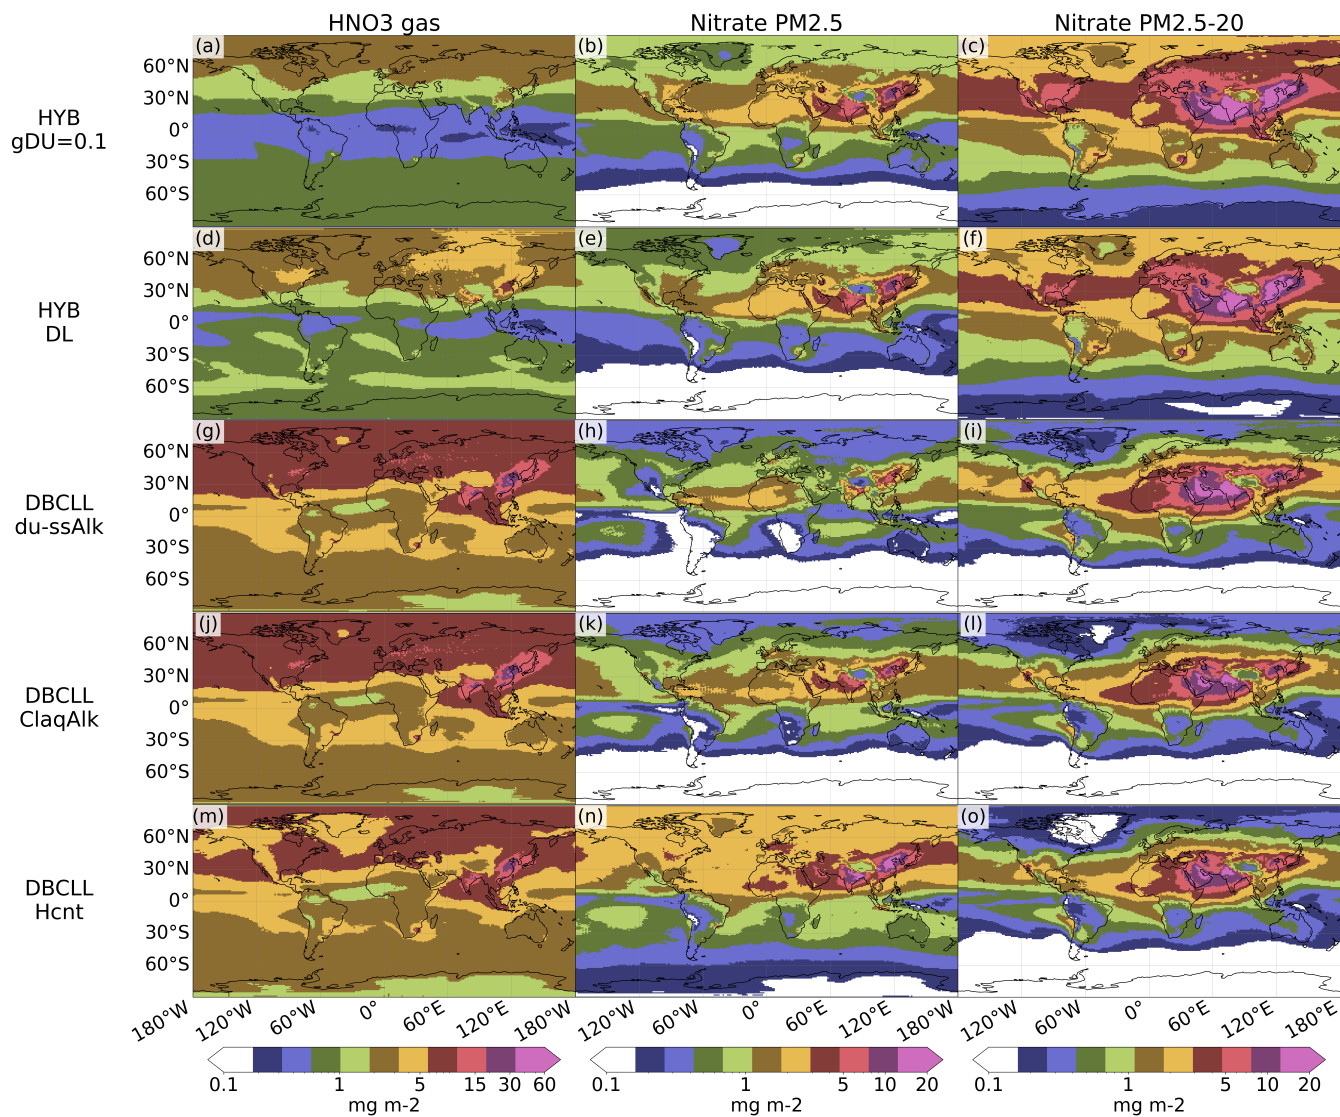

**Figure S3.** Column load ( $mg\ m^{-2}$ ) of  $HNO_3(g)$ , fine and coarse particulate nitrate simulated by additional mechanisms, averaged for 2018.

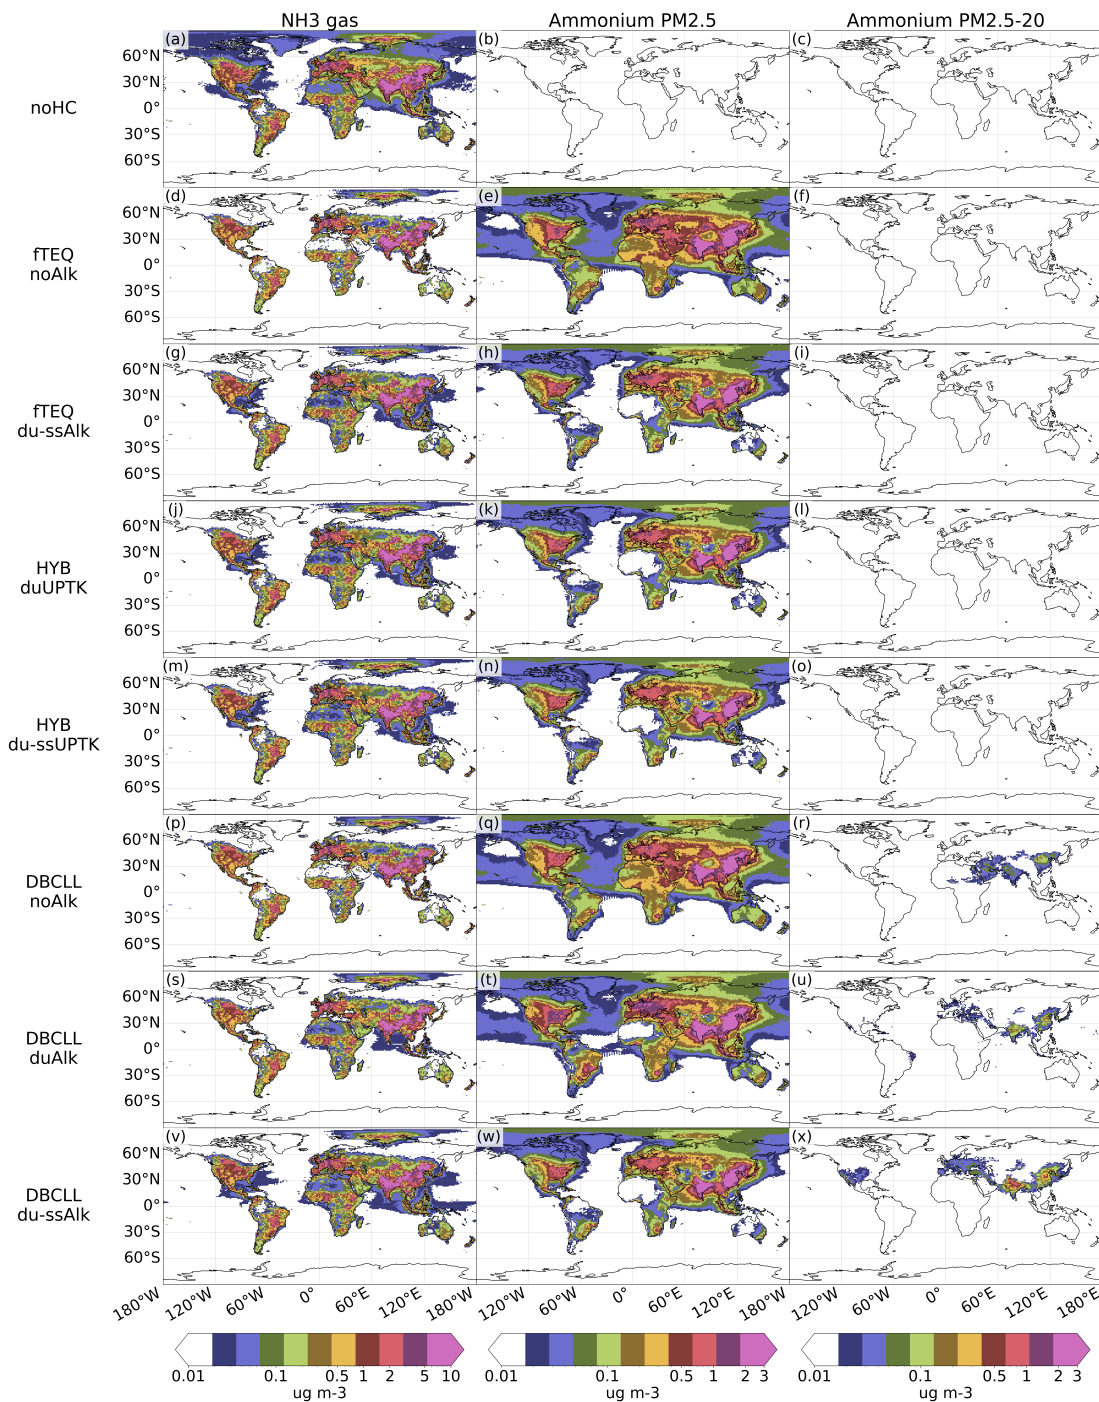

**Figure S4.** Surface concentration ( $\mu\text{g m}^{-3}$ ) of  $\text{NH}_3(\text{g})$ , fine and coarse particulate ammonium simulated by the different mechanisms, averaged for 2018.

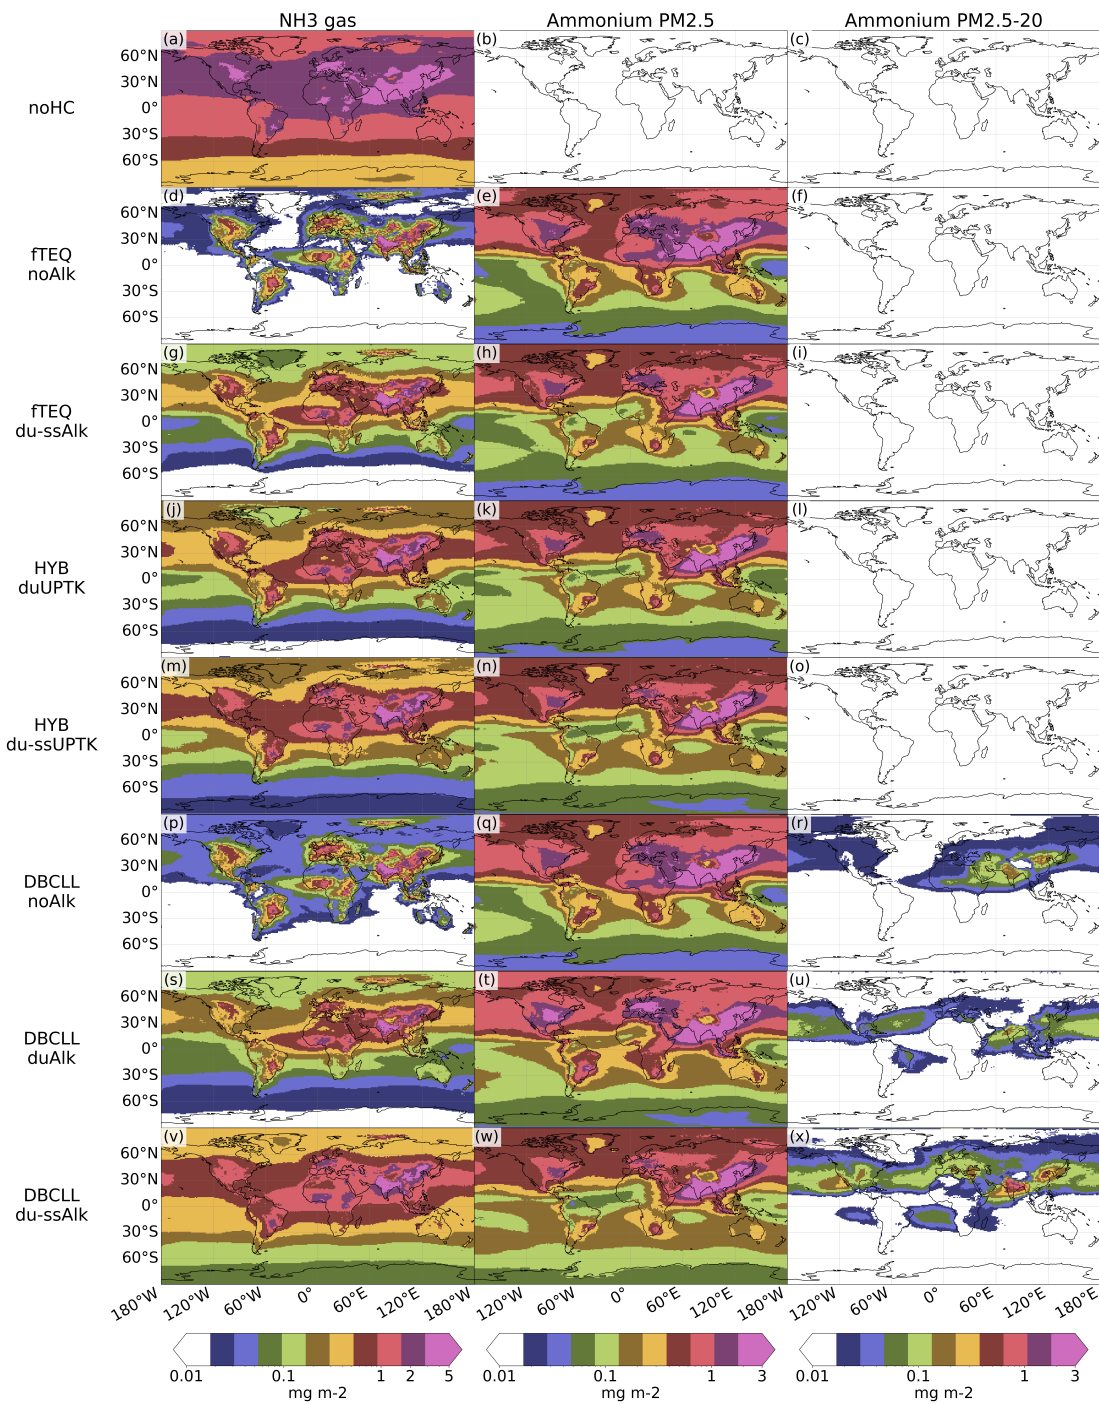

**Figure S5.** Column load ( $\text{mg m}^{-2}$ ) of  $\text{NH}_3(\text{g})$ , fine and coarse particulate ammonium simulated by different mechanisms, averaged for 2018.

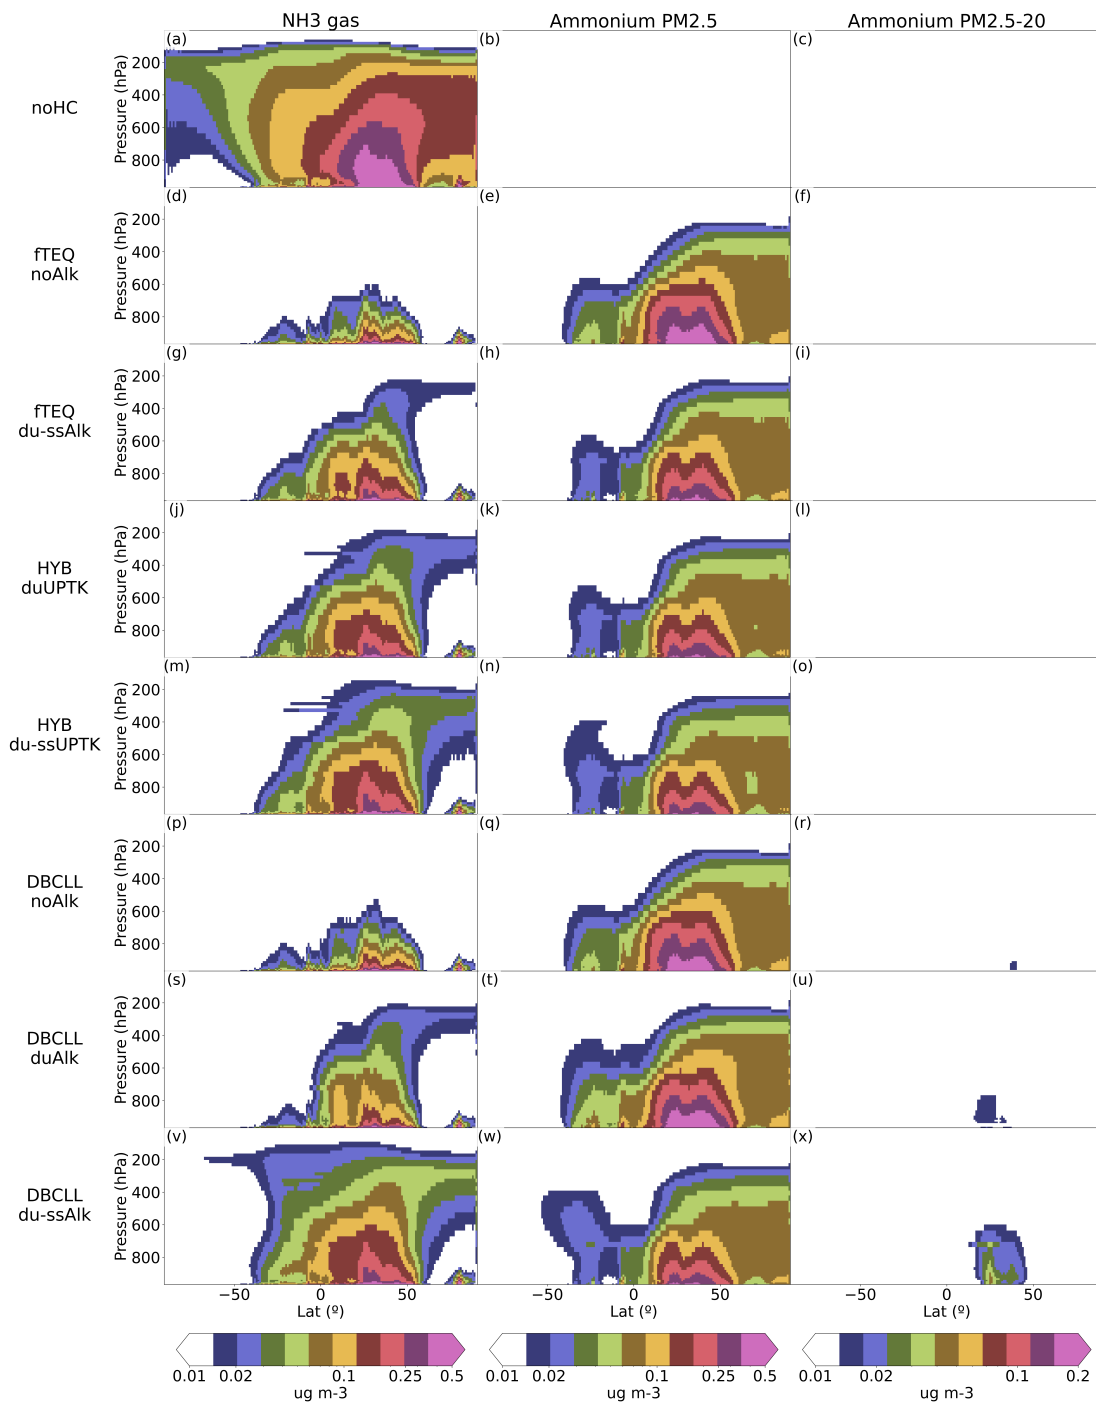

**Figure S6.** Zonal average concentration ( $\mu\text{g m}^{-3}$ ) of  $\text{NH}_3(\text{g})$ , fine and coarse particulate ammonium simulated by the different mechanisms in 2018.



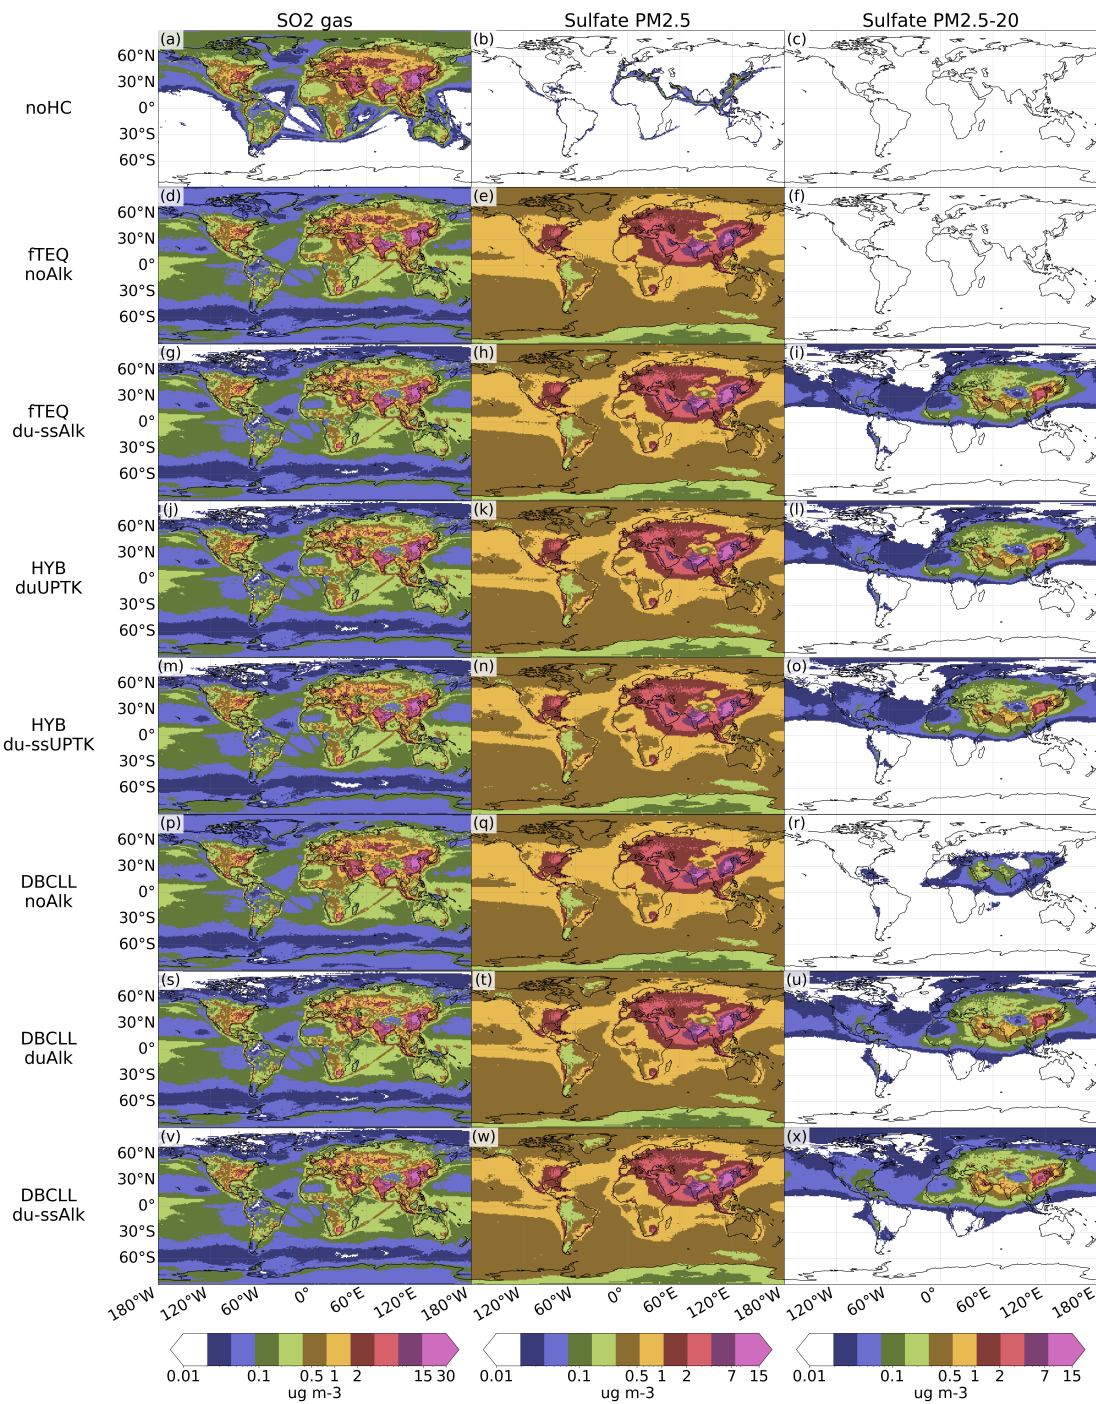

**Figure S7.** Surface concentration ( $\mu\text{g m}^{-3}$ ) of  $\text{SO}_2(\text{g})$ , fine and coarse particulate sulfate simulated by the different mechanisms, averaged for 2018.

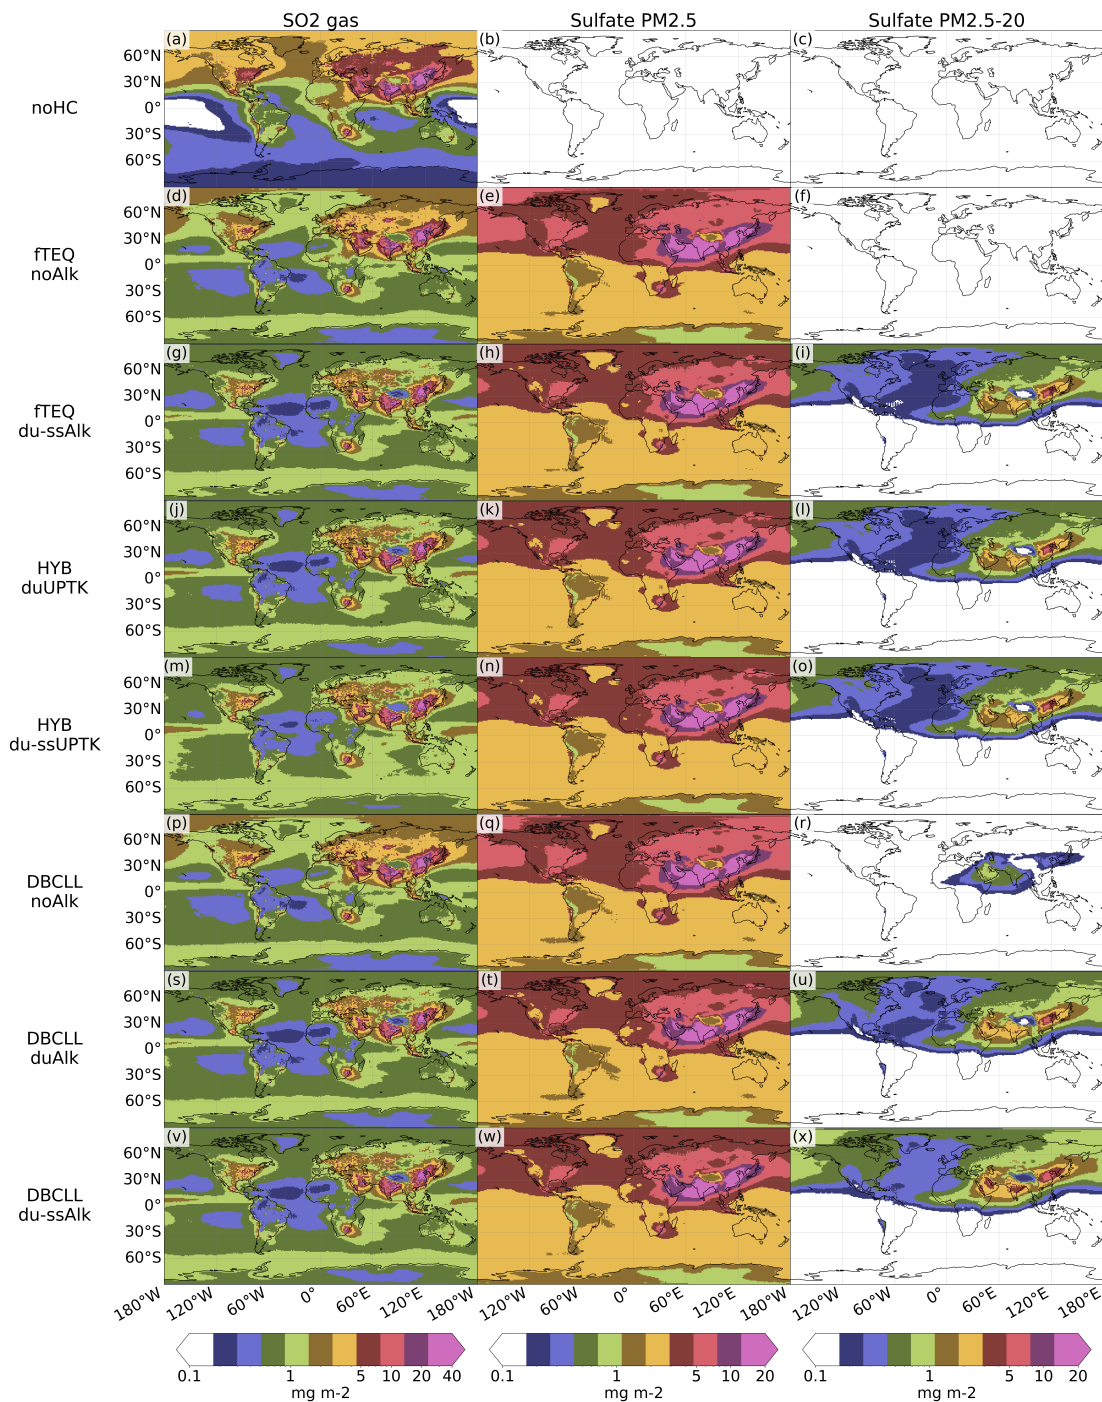

**Figure S8.** Column load ( $\text{mg m}^{-2}$ ) of  $\text{SO}_2(\text{g})$ , fine and coarse particulate sulfate simulated by different mechanisms, averaged for 2018.

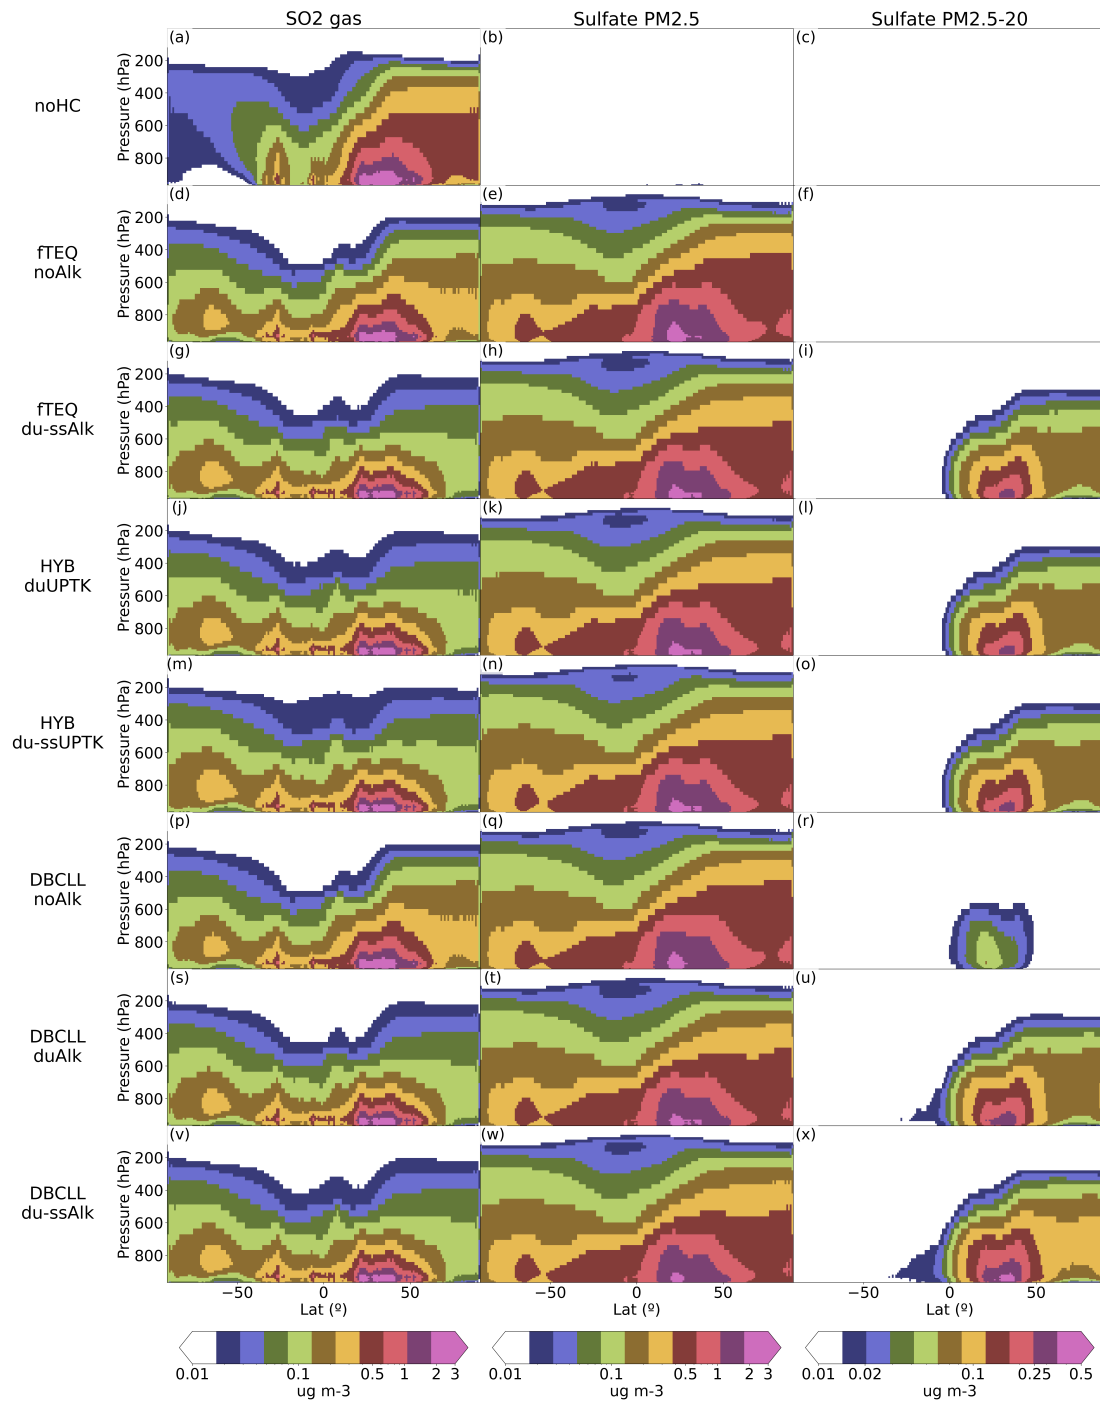

**Figure S9.** Zonal average concentration ( $\mu\text{g m}^{-3}$ ) of  $\text{SO}_2(\text{g})$ , fine and coarse particulate sulfate simulated by the different mechanisms in 2018.

Column average concentration (20180101 to 20181231)

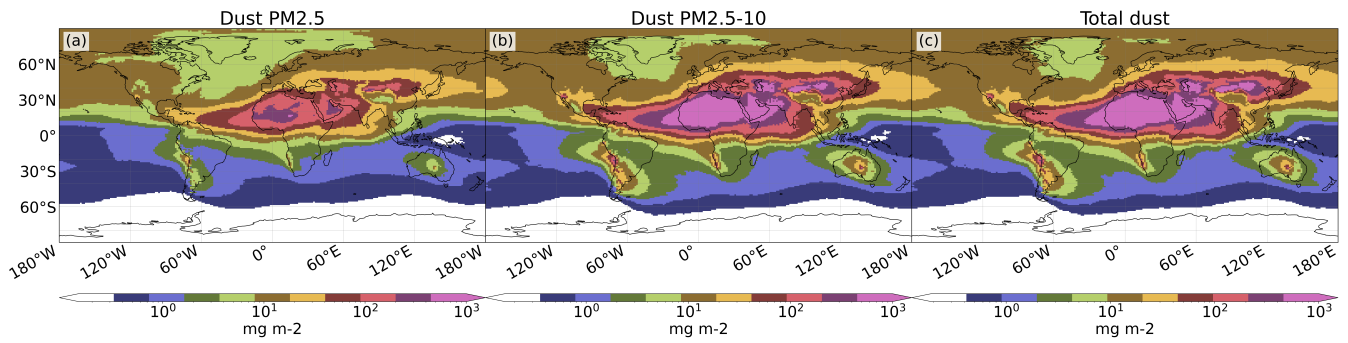

**Figure S10.** Dust average column load ( $\text{mg m}^{-2}$ ) for 2018.

Column average concentration (20180101 to 20181231)

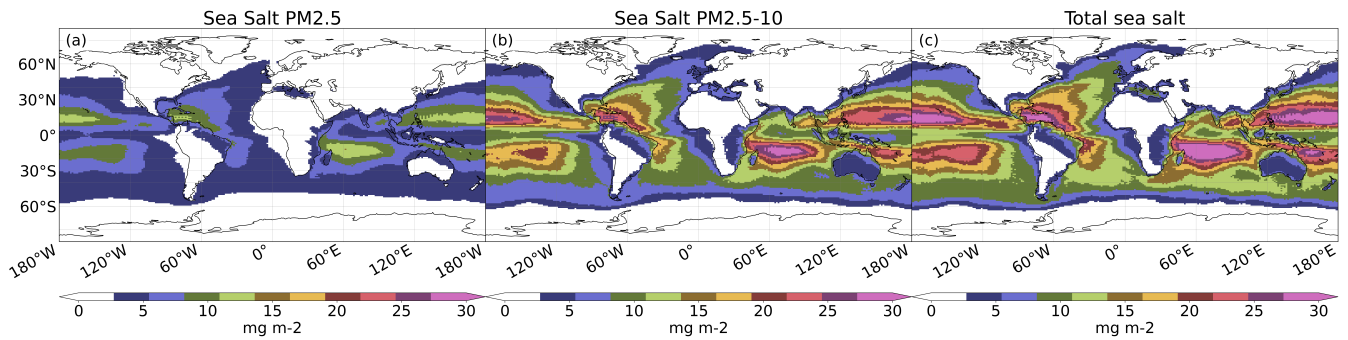

**Figure S11.** Sea salt average column load ( $\text{mg m}^{-2}$ ) for 2018.



### S3 Statistical metrics and supplementary evaluation results

Each experiment is evaluated against observations in terms of correlation coefficient (corr), mean bias (bias) and root mean square error (rmse), formulated as follows:

$$corr = \frac{\sum_{i=1}^N (S_i - \bar{S})(O_i - \bar{O})}{\sqrt{\sum_{i=1}^N (S_i - \bar{S})^2} \sqrt{\sum_{i=1}^N (O_i - \bar{O})^2}} \quad (1)$$

$$bias = \frac{\sum_{i=1}^N (S_i - O_i)}{N} \quad (2)$$

$$rmse = \sqrt{\frac{\sum_{i=1}^N (S_i - O_i)^2}{N}} \quad (3)$$

Where  $S$  are the simulation results,  $O$  the observations and  $N$  the number of observations.

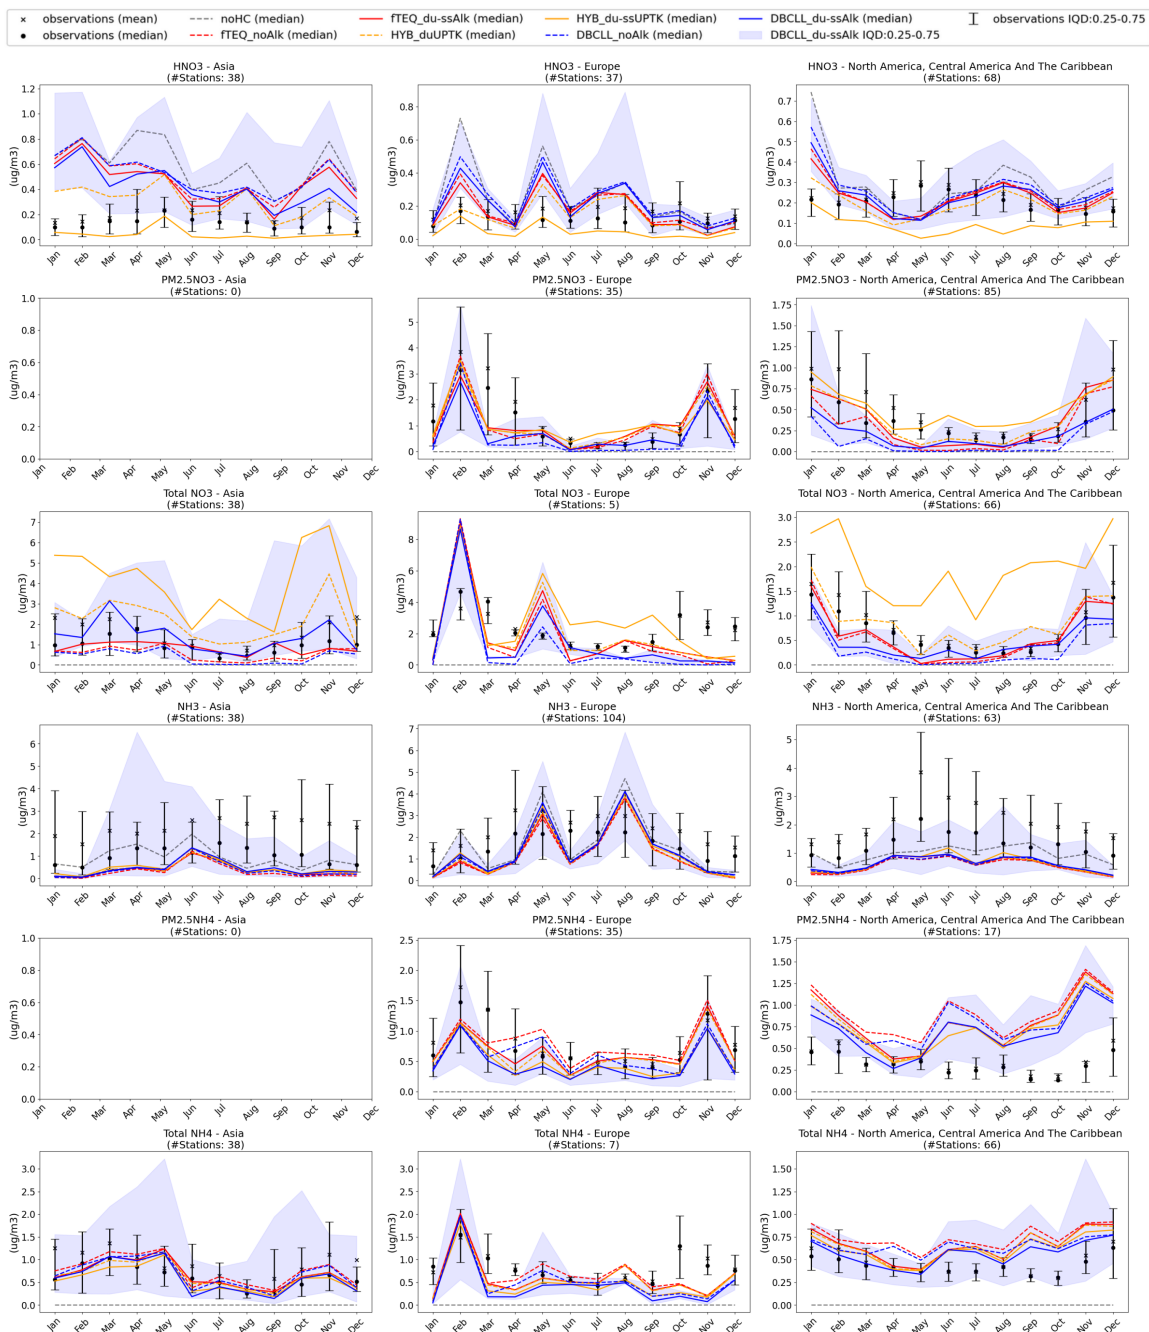

**Figure S12.** Yearly surface concentration evaluation for Asia, Europe and North-Central America continents. Species are in rows and continents in columns. Black solid dots and crosses represent observational mean and median, respectively. Error bars are the interquartile 0.25 to 0.75 distance. Coloured lines represent medians obtained from the most representative configurations. Blue shade is the interquartile 0.25 - 0.75 distance for the DBCLL\_du-ssAlk simulation. Observational PM<sub>10</sub> from EANET (Asia) and US-EPA-CASTNET (North America) refers to total particle concentration, while GHOST data refers to data limited to PM<sub>10</sub>.

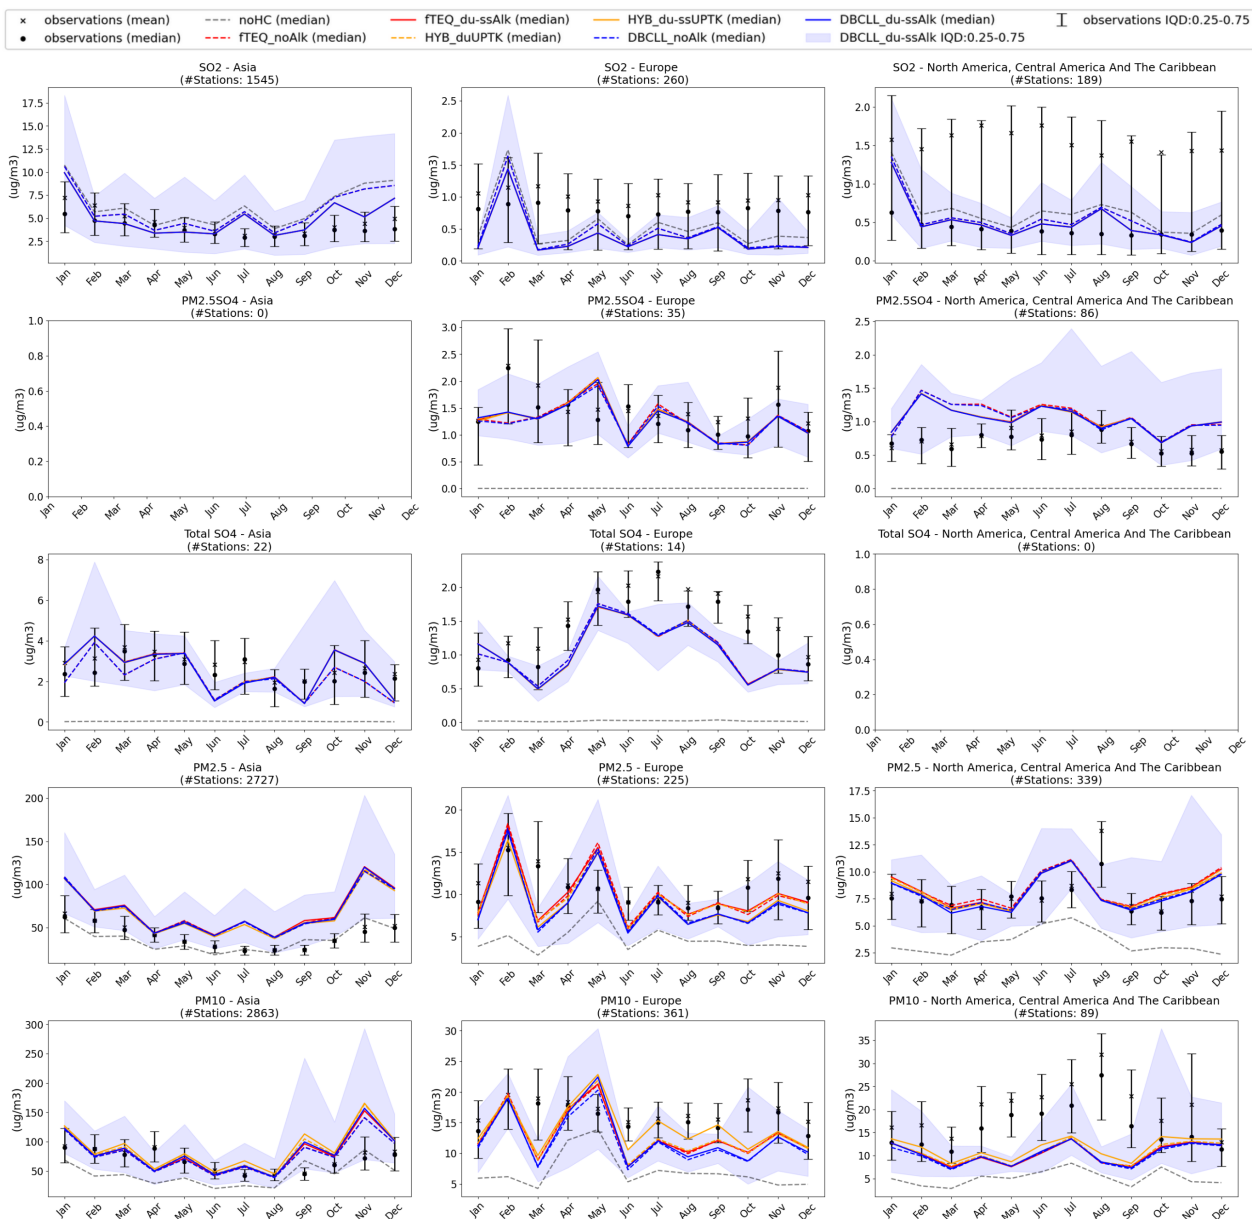

**Figure S12.** Yearly surface concentration evaluation for Asia, Europe and North-Central America continents. Species are in rows and continents in columns. Black solid dots and crosses represent observational mean and median, respectively. Error bars are the interquartile 0.25 to 0.75 distance. Coloured lines represent medians obtained from the most representative configurations. Blue shade is the interquartile 0.25 - 0.75 distance for the DBCLL<sub>du-ssAlk</sub> simulation. Observational PM<sub>10</sub> from EANET (Asia) and US-EPA-CASTNET (North America) for sulfate refers to total particle concentration, while GHOST data refers to data limited to PM<sub>10</sub>.

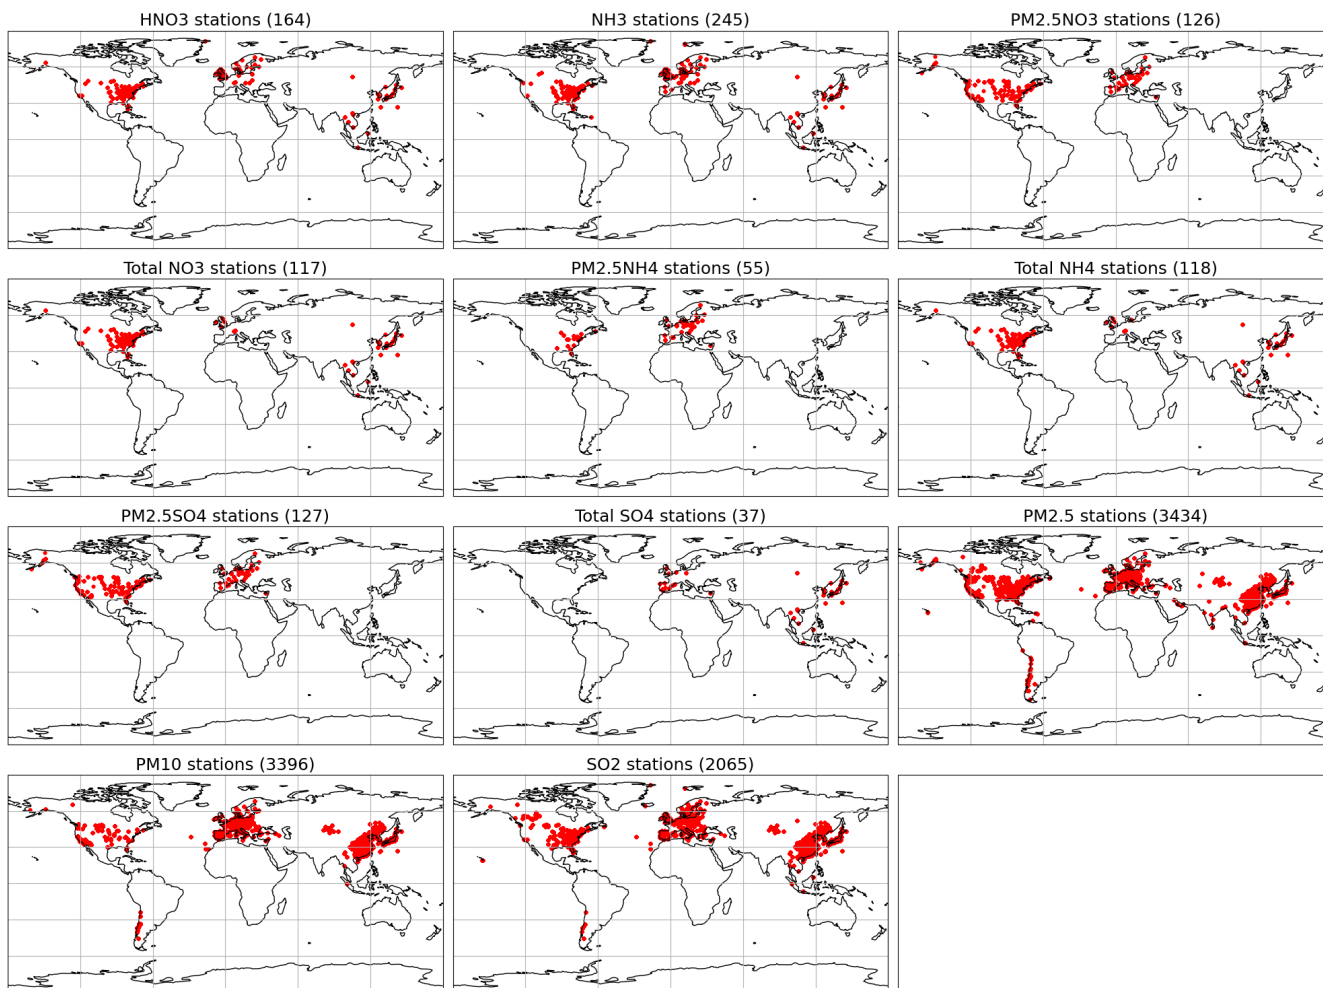

**Figure S13.** Stations used for each species in the observational evaluation from the main text Figure 5 and Supplement Figure S12.

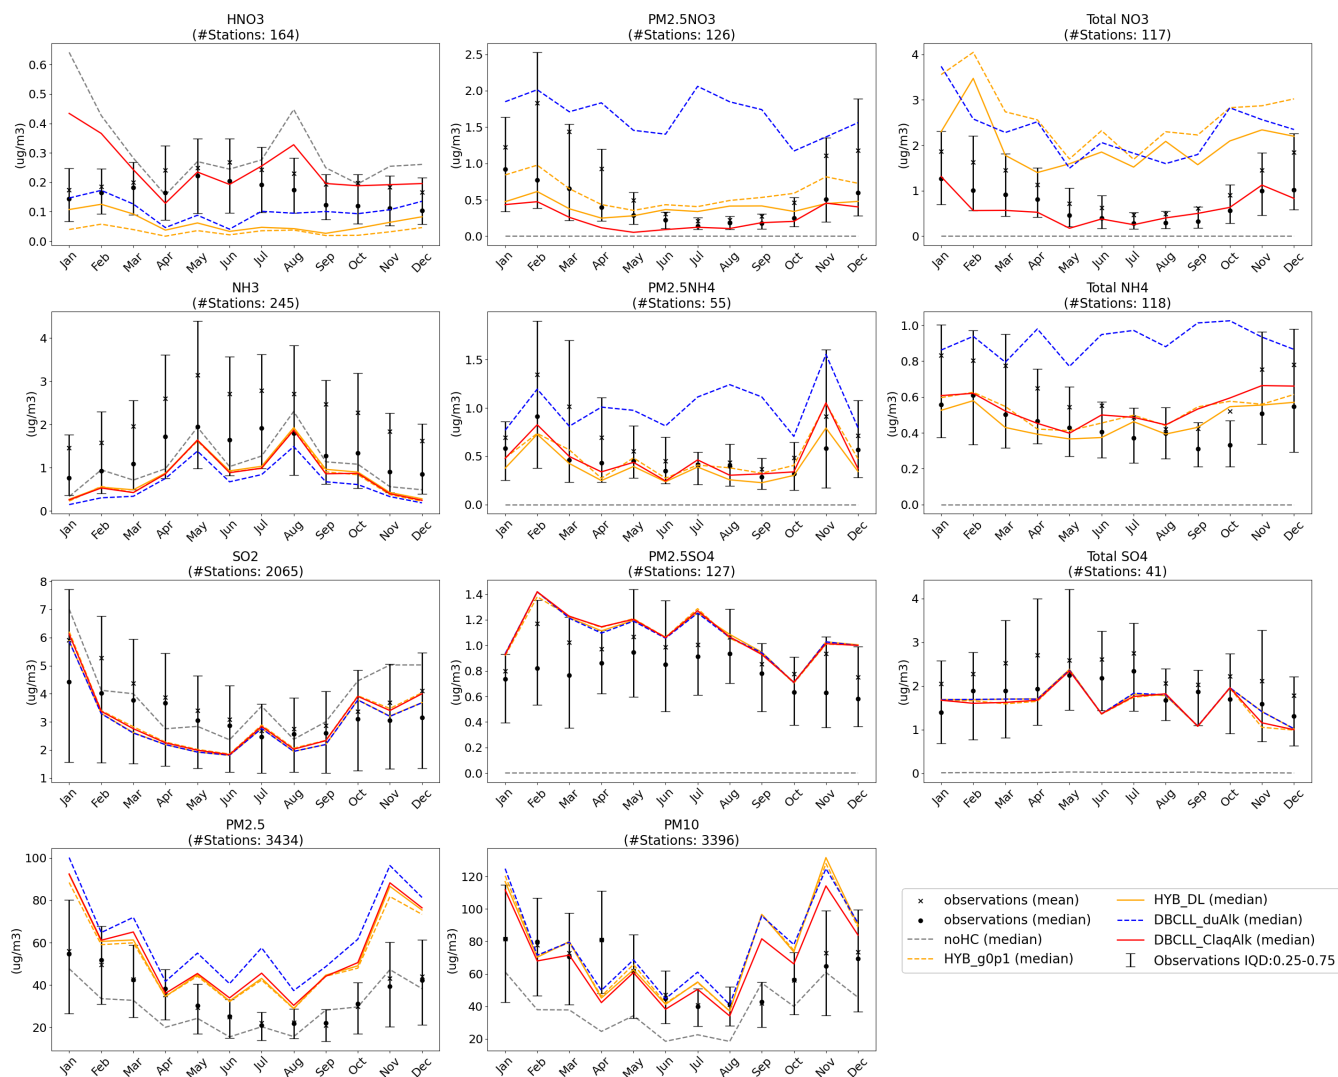

**Figure S14.** Observational evaluation of gas and particulate species. Black solid dots and crosses represent monthly mean and median of observations, respectively. Colour lines represent each configuration’s monthly median surface concentrations over observational points. Error bars are the observational interquartile 0.25 to 0.75 distance. For the Total  $\text{NO}_3$  modes, data from Europe, Asia and North-Central America has been averaged, despite data from Asia and North-Central America refers to total particle concentration, while data from Europe is limited strictly to  $10\mu\text{m}$  particle diameter.

**Table S7:** Correlation coefficients, bias and root mean square error (RMSE) of each configuration's results median with respect to observations' median for timeseries of Figure 5 from the main manuscript.

|                      | <b>HNO3</b>  |             |             | <b>PM2.5NO3</b> |             |             | <b>Total NO3</b> |             |             |
|----------------------|--------------|-------------|-------------|-----------------|-------------|-------------|------------------|-------------|-------------|
|                      | <b>corr</b>  | <b>bias</b> | <b>rmse</b> | <b>corr</b>     | <b>bias</b> | <b>rmse</b> | <b>corr</b>      | <b>bias</b> | <b>rmse</b> |
| <b>noHC</b>          | 0.03         | 0.15        | 0.20        | 0.00            | -0.43       | 0.49        | 0.00             | -0.70       | 0.77        |
| <b>HYB_g0p1</b>      | 0.05         | -0.13       | 0.13        | 0.83            | 0.18        | 0.23        | 0.81             | 1.96        | 2.01        |
| <b>HYB_DL</b>        | -0.08        | -0.10       | 0.11        | 0.61            | -0.03       | 0.21        | 0.53             | 1.32        | 1.40        |
| <b>DBCLL_duAlk</b>   | -0.34        | -0.05       | 0.08        | 0.21            | 1.24        | 1.28        | 0.80             | 1.61        | 1.65        |
| <b>DBCLL_ClaqAlk</b> | 0.14         | 0.09        | 0.12        | 0.82            | -0.18       | 0.24        | 0.81             | -0.09       | 0.22        |
|                      | <b>NH3</b>   |             |             | <b>PM2.5NH4</b> |             |             | <b>Total NH4</b> |             |             |
|                      | <b>corr</b>  | <b>bias</b> | <b>rmse</b> | <b>corr</b>     | <b>bias</b> | <b>rmse</b> | <b>corr</b>      | <b>bias</b> | <b>rmse</b> |
| <b>noHC</b>          | 0.80         | -0.29       | 0.44        | 0.00            | -0.48       | 0.51        | 0.00             | -0.45       | 0.46        |
| <b>HYB_g0p1</b>      | 0.85         | -0.53       | 0.59        | 0.64            | 0.01        | 0.16        | 0.47             | 0.07        | 0.11        |
| <b>HYB_DL</b>        | 0.85         | -0.49       | 0.56        | 0.77            | -0.09       | 0.14        | 0.50             | 0.02        | 0.09        |
| <b>DBCLL_duAlk</b>   | 0.88         | -0.71       | 0.73        | 0.27            | 0.53        | 0.58        | -0.46            | 0.46        | 0.48        |
| <b>DBCLL_ClaqAlk</b> | 0.85         | -0.53       | 0.59        | 0.70            | -0.01       | 0.16        | 0.50             | 0.09        | 0.12        |
|                      | <b>SO2</b>   |             |             | <b>PM2.5SO4</b> |             |             | <b>Total SO4</b> |             |             |
|                      | <b>corr</b>  | <b>bias</b> | <b>rmse</b> | <b>corr</b>     | <b>bias</b> | <b>rmse</b> | <b>corr</b>      | <b>bias</b> | <b>rmse</b> |
| <b>noHC</b>          | 0.61         | 0.65        | 1.24        | 0.59            | -0.79       | 0.80        | 0.62             | -1.91       | 1.93        |
| <b>HYB_g0p1</b>      | 0.62         | -0.12       | 0.94        | 0.59            | 0.29        | 0.32        | 0.53             | -0.42       | 0.54        |
| <b>HYB_DL</b>        | 0.63         | -0.29       | 0.91        | 0.57            | 0.29        | 0.33        | 0.60             | -0.39       | 0.50        |
| <b>DBCLL_duAlk</b>   | 0.63         | -0.29       | 0.91        | 0.55            | 0.29        | 0.32        | 0.59             | -0.38       | 0.49        |
| <b>DBCLL_ClaqAlk</b> | 0.62         | -0.16       | 0.94        | 0.57            | 0.29        | 0.33        | 0.55             | -0.41       | 0.52        |
|                      | <b>PM2.5</b> |             |             | <b>PM10</b>     |             |             |                  |             |             |
|                      | <b>corr</b>  | <b>bias</b> | <b>rmse</b> | <b>corr</b>     | <b>bias</b> | <b>rmse</b> |                  |             |             |
| <b>noHC</b>          | 0.75         | -5.62       | 9.55        | 0.40            | -23.16      | 28.42       |                  |             |             |
| <b>HYB_g0p1</b>      | 0.76         | 18.02       | 21.95       | 0.38            | 14.27       | 29.96       |                  |             |             |
| <b>HYB_DL</b>        | 0.76         | 19.44       | 23.81       | 0.36            | 13.87       | 30.41       |                  |             |             |
| <b>DBCLL_duAlk</b>   | 0.71         | 28.07       | 31.58       | 0.38            | 16.47       | 30.10       |                  |             |             |
| <b>DBCLL_ClaqAlk</b> | 0.76         | 20.75       | 24.88       | 0.43            | 7.45        | 24.20       |                  |             |             |

**Table S8.** GHOST quality flags used for the observational evaluation.

| Code | Flag                                                                     | Description                                                                                                                                                                                          |
|------|--------------------------------------------------------------------------|------------------------------------------------------------------------------------------------------------------------------------------------------------------------------------------------------|
| 0    | Missing Measurement                                                      | i.e. NaN.                                                                                                                                                                                            |
| 1    | Infinite Value                                                           | Value is infinite – occurs when data values are outside of the range that <i>float32</i> data type can handle (-3.4E+38 to +3.4E+38).                                                                |
| 2    | Negative Measurement                                                     | Measurement is negative in absolute terms.                                                                                                                                                           |
| 6    | Invalid Data Provider Flags - GHOST Decreed                              | Measurements are associated with data quality flags given by the data provider which have been decreed by the GHOST project architects as being associated with substantial uncertainty/bias.        |
| 8    | No Valid Data to Average                                                 | After screening by key QA flags, no valid data remains to average in the temporal window.                                                                                                            |
| 20   | Erroneous Primary Sampling                                               | The primary sampling is not appropriate to prepare the specific parameter for subsequent measurement.                                                                                                |
| 21   | Erroneous Sample Preparation                                             | The sample preparation is not appropriate to prepare the specific parameter for subsequent measurement.                                                                                              |
| 22   | Erroneous Measurement Methodology                                        | The measurement methodology used is not known to be able to measure the specific parameter.                                                                                                          |
| 72   | Below Preferential Lower Limit of Detection                              | Measurement is below or equal to the preferential lower limit of detection.                                                                                                                          |
| 75   | Above Preferential Upper Limit of Detection                              | Measurement is above or equal to the preferential upper limit of detection.                                                                                                                          |
| 82   | Insufficient Measurement Resolution - Preferential                       | The preferential resolution for the measurement is coarser than a set limit (variable by measured parameter).                                                                                        |
| 83   | Insufficient Measurement Resolution - Empirical                          | The resolution of the measurement is analysed month by month. If the minimum difference between observations is coarser than a set limit (variable by measured parameter), measurements are flagged. |
| 110  | Data Outlier - Exceeds Scientifically Decreed Lower/Upper Limit          | The measured value is below or greater than scientifically feasible lower/upper limits (variable by parameter).                                                                                      |
| 111  | Data Outlier - Monthly Median Exceeds Scientifically Decreed Upper Limit | The median of the measurements in a month is greater than a scientifically feasible limit (variable by parameter).                                                                                   |
| 112  | Data Outlier - Network Decreed                                           | Data has been reported to be an outlier through data flags by the network data reporters (and not manually checked and verified as valid).                                                           |
| 113  | Data Outlier - Manually Decreed                                          | Data has been found and decreed manually to be an outlier.                                                                                                                                           |
| 115  | Probable Data Outlier - Monthly Adjusted Boxplot                         | Measured value exceeds adjusted boxplot outer fence (lower or upper) of monthly data, therefore is a probable data outlier.                                                                          |
| 132  | Systematic Inconsistent Monthly Distributions - 4/6 Months >= Zone 6     | 4 out of 6 months' distributions are classed as Zone 6 or higher, suggesting there are potentially systematic reasons for the inconsistent distributions across the 6 months.                        |
| 133  | Systematic Inconsistent Monthly Distributions - 8/12 Months >= Zone 6    | 8 out of 12 months' distributions are classed as Zone 6 or higher, suggesting there are potentially systematic reasons for the inconsistent distributions across the 12 months.                      |

**Table S9.** Results for gas  $\text{HNO}_{3(g)}$  obtained with the studied heterogeneous chemistry mechanisms. Results from the references are reported at the end of the Table: the average of all the participating models in the intercomparison AeroCom phase III nitrate experiment for 2008, specifying their standard deviation (*STD*), and results from the GMI model (using a similar HYB approach with UPTK reactions on dust and SS) and the EMAC model (*EMAC 2008*, that uses a similar approach to DBCLL\_du-ssAlk). Also using the EMAC model, results obtained by the Karydis et al. (2016) study are reported as *EMAC 2005-2008*. Results from models using a similar approach to HYB\_du-ssUPTK are reported as *IFS* for Rémy et al. (2022), *LMDz-INCA* for Hauglustaine et al. (2014) and *MetOffice UM* for Jones et al. (2021).

| $\text{HNO}_{3(g)}$               | <b>Burden</b><br>(Tg) | <b>Wet Dep.</b><br>(Tg y-1) | <b>Dry Dep.</b><br>(Tg y-1) | <b>Total Dep.</b><br>(Tg y-1) | <b>Production</b><br>(Tg y-1) | <b>Lifetime</b><br>(days) |
|-----------------------------------|-----------------------|-----------------------------|-----------------------------|-------------------------------|-------------------------------|---------------------------|
| <b>noHC</b>                       | 4.79                  | 47.1                        | 110.4                       | 157.5                         | 158.3                         | 5.5                       |
| <b>fTEQ_noAlk</b>                 | 4.99                  | 48.6                        | 107.3                       | 155.9                         | 156.7                         | 5.8                       |
| <b>fTEQ_du-ssAlk</b>              | 2.93                  | 41.4                        | 77.4                        | 118.8                         | 119.3                         | 4.5                       |
| <b>HYB_duUPTK</b>                 | 1.96                  | 29.9                        | 52.0                        | 81.9                          | 82.4                          | 4.4                       |
| <b>HYB_du-ssUPTK</b>              | 0.69                  | 7.2                         | 13.7                        | 20.9                          | 21.4                          | 5.9                       |
| <b>HYB_gDU=0.1</b>                | 0.46                  | 5.9                         | 5.9                         | 11.8                          | 12.2                          | 7.1                       |
| <b>HYB_DL</b>                     | 0.72                  | 6.7                         | 14.0                        | 20.7                          | 21.2                          | 6.2                       |
| <b>DBCLL_noAlk</b>                | 5.13                  | 49.1                        | 109.1                       | 158.2                         | 159.0                         | 5.9                       |
| <b>DBCLL_duAlk</b>                | 2.72                  | 45.4                        | 59.9                        | 105.3                         | 105.7                         | 4.7                       |
| <b>DBCLL_du-ssAlk</b>             | 2.53                  | 36.1                        | 61.9                        | 98.0                          | 98.6                          | 4.7                       |
| <b>DBCLL_ClaqAlk</b>              | 2.58                  | 36.2                        | 62.1                        | 98.3                          | 98.9                          | 4.8                       |
| <b>AeroCom</b>                    | <b>2.50</b>           | <b>108.7</b>                | <b>45.8</b>                 | <b>154.5</b>                  | <b>179.0</b>                  | <b>4.6</b>                |
| <b>STD AeroCom</b>                | <b>±1.83</b>          | <b>±39.8</b>                | <b>±13.0</b>                | <b>±52.8</b>                  | <b>±89.9</b>                  | <b>±1.6</b>               |
| <b>GMI</b>                        | <b>2.50</b>           | <b>108.7</b>                | <b>45.8</b>                 | <b>154.5</b>                  | <b>110.0</b>                  | <b>3.5</b>                |
| <b>EMAC 2008<sup>1</sup></b>      | <b>3.10</b>           | <b>136.0</b>                | <b>56.1</b>                 | <b>192.1</b>                  | -                             | -                         |
| <b>EMAC 2005-2008<sup>2</sup></b> | <b>1.65</b>           | -                           | -                           | -                             | -                             | -                         |
| <b>IFS</b>                        | -                     | -                           | -                           | -                             | -                             | -                         |
| <b>LMDz-INCA</b>                  | <b>1.35</b>           | <b>76.6</b>                 | <b>66.0</b>                 | <b>142.6</b>                  | <b>218.3</b>                  | <b>2.3</b>                |
| <b>MetOffice UM<sup>3</sup></b>   | <b>2.16</b>           | <b>67.1</b>                 | <b>27.0</b>                 | <b>94.1</b>                   | <b>242.1</b>                  | <b>3.2</b>                |

<sup>1</sup> From Bian et al. (2017).

<sup>2</sup> From Karydis et al. (2016).

<sup>3</sup> Jones et al. (2021) performs two sensitivity tests to the accommodation coefficient used for  $\text{NO}_3^-$  formation in the fine mode: *FAST* with 0.193 and *SLOW* with 0.001. Here, results from the *FAST* test are reported on the basis that they present similar fine  $\text{NO}_3^-$  formation rates to our average fine nitrate results



**Table S10.** Results for gas  $\text{NH}_{3(\text{g})}$  obtained with the studied heterogeneous chemistry mechanisms. Results from the references are reported at the end of the Table: the average of all the participating models in the intercomparison AeroCom phase III nitrate experiment for 2008, specifying their standard deviation (*STD*), and results from the GMI model (using a similar HYB approach with UPTK reactions on dust and SS) and the EMAC model (*EMAC 2008*, that uses a similar approach to DBCLL\_du-ssAlk). Also using the EMAC model, results obtained by the Karydis et al. (2016) study are reported as *EMAC 2005-2008*. Results from models using a similar approach to HYB\_du-ssUPTK are reported as *IFS* for Rémy et al. (2022), *LMDz-INCA* for Hauglustaine et al. (2014) and *MetOffice UM* for Jones et al. (2021).

| $\text{NH}_{3(\text{g})}$         | <b>Emissions<br/>(Tg y-1)</b> | <b>Burden<br/>(Tg)</b> | <b>Wet Dep.<br/>(Tg y-1)</b> | <b>Dry Dep.<br/>(Tg y-1)</b> | <b>Total Dep.<br/>(Tg y-1)</b> | <b>Loss<br/>(Tg y-1)</b> | <b>Lifetime<br/>(days)</b> |
|-----------------------------------|-------------------------------|------------------------|------------------------------|------------------------------|--------------------------------|--------------------------|----------------------------|
| <b>noHC</b>                       | 61.8                          | 0.86                   | 7.1                          | 54.5                         | 61.7                           | 0.0                      | 5.1                        |
| <b>fTEQ_noAlk</b>                 | 61.8                          | 0.05                   | 1.3                          | 39.6                         | 40.9                           | -20.9                    | 0.3                        |
| <b>fTEQ_du-ssAlk</b>              | 61.8                          | 0.16                   | 1.8                          | 44.2                         | 45.9                           | -15.9                    | 0.9                        |
| <b>HYB_duUPTK</b>                 | 61.8                          | 0.21                   | 1.9                          | 44.7                         | 46.6                           | -15.1                    | 1.2                        |
| <b>HYB_du-ssUPTK</b>              | 61.8                          | 0.26                   | 2.2                          | 45.6                         | 47.8                           | -14.0                    | 1.5                        |
| <b>HYB_gDU=0.1</b>                | 61.8                          | 0.28                   | 2.2                          | 46.0                         | 48.3                           | -13.5                    | 1.7                        |
| <b>HYB_DL</b>                     | 61.8                          | 0.38                   | 2.9                          | 46.7                         | 49.6                           | -12.1                    | 2.2                        |
| <b>DBCLL_noAlk</b>                | 61.8                          | 0.06                   | 1.6                          | 40.4                         | 42.0                           | -19.8                    | 0.4                        |
| <b>DBCLL_duAlk</b>                | 61.8                          | 0.14                   | 1.8                          | 39.8                         | 41.7                           | -20.2                    | 0.8                        |
| <b>DBCLL_du-ssAlk</b>             | 61.8                          | 0.35                   | 2.8                          | 45.9                         | 48.6                           | -13.2                    | 2.0                        |
| <b>DBCLL_ClaqAlk</b>              | 61.8                          | 0.31                   | 2.7                          | 45.5                         | 48.2                           | -13.6                    | 1.8                        |
| <b>AeroCom</b>                    | <b>62.9</b>                   | <b>0.20</b>            | <b>13.4</b>                  | <b>18.7</b>                  | <b>32.1</b>                    | <b>-32.1</b>             | <b>0.7</b>                 |
| <b>STD AeroCom</b>                | <b>±3.9</b>                   | <b>±0.20</b>           | <b>±5.1</b>                  | <b>±5.1</b>                  | <b>±10.2</b>                   | <b>±12.0</b>             | <b>±0.3</b>                |
| <b>GMI</b>                        | <b>60.4</b>                   | <b>0.85</b>            | <b>1.1</b>                   | <b>8.7</b>                   | <b>9.8</b>                     | <b>-50.1</b>             | <b>5.2</b>                 |
| <b>EMAC 2008<sup>1</sup></b>      | <b>59.3</b>                   | <b>0.85</b>            | <b>0.0</b>                   | <b>15.5</b>                  | <b>15.5</b>                    | <b>-</b>                 | <b>-</b>                   |
| <b>EMAC 2005-2008<sup>2</sup></b> | <b>-</b>                      | <b>0.82</b>            | <b>-</b>                     | <b>-</b>                     | <b>-</b>                       | <b>-</b>                 | <b>-</b>                   |
| <b>IFS</b>                        | <b>-</b>                      | <b>-</b>               | <b>-</b>                     | <b>-</b>                     | <b>-</b>                       | <b>-</b>                 | <b>-</b>                   |
| <b>LMDz-INCA</b>                  | <b>61.3</b>                   | <b>0.11</b>            | <b>13.4</b>                  | <b>25.9</b>                  | <b>39.3</b>                    | <b>-21.2</b>             | <b>0.6</b>                 |
| <b>MetOffice UM<sup>3</sup></b>   | <b>64.7</b>                   | <b>0.05</b>            | <b>6.9</b>                   | <b>21.1</b>                  | <b>28.0</b>                    | <b>-36.8</b>             | <b>0.3</b>                 |

<sup>1</sup> From Bian et al. (2017).

<sup>2</sup> From Karydis et al. (2016).

<sup>3</sup> Jones et al. (2021) performs two sensitivity tests to the accommodation coefficient used for  $\text{NO}_3^-$  formation in the fine mode: *FAST* with 0.193 and *SLOW* with 0.001. Here, results from the *FAST* test are reported on the basis that they present similar fine  $\text{NO}_3^-$  formation rates to our average fine nitrate results.

**Table S11.** Results for particle  $\text{NH}_4^+$  obtained with the studied heterogeneous chemistry mechanisms. Results from the references are reported at the end of the Table: the average of all the participating models in the intercomparison AeroCom phase III nitrate experiment for 2008, specifying their standard deviation (*STD*), and results from the GMI model (using a similar HYB approach with UPTK reactions on dust and SS) and the EMAC model (*EMAC 2008*, that uses a similar approach to DBCELL\_du-ssAlk). Also using the EMAC model, results obtained by the Karydis et al. (2016) study are reported as *EMAC 2005-2008*. Results from models using a similar approach to HYB\_du-ssUPTK are reported as *IFS* for Rémy et al. (2022), *LMDz-INCA* for Hauglustaine et al. (2014) and *MetOffice UM* for Jones et al. (2021).

| Experiment                        | Burden (Tg) |        |              | Wet Dep. (Tg y <sup>-1</sup> ) |        |              | Dry Dep. (Tg y <sup>-1</sup> ) |        |             | Total Dep. (Tg y <sup>-1</sup> ) |        |              | Production (Tg y <sup>-1</sup> ) |        |             | Lifetime (days) |        |             |
|-----------------------------------|-------------|--------|--------------|--------------------------------|--------|--------------|--------------------------------|--------|-------------|----------------------------------|--------|--------------|----------------------------------|--------|-------------|-----------------|--------|-------------|
|                                   | Fine        | Coarse | Total        | Fine                           | Coarse | Total        | Fine                           | Coarse | Total       | Fine                             | Coarse | Total        | Fine                             | Coarse | Total       | Fine            | Coarse | Total       |
| <i>fTEQ_noAlk</i>                 | 0.30        | 0.00   | <b>0.30</b>  | 19.2                           | 0.0    | <b>19.2</b>  | 3.0                            | 0.0    | <b>3.0</b>  | 22.2                             | 0.0    | <b>22.2</b>  | 22.2                             | 0.0    | <b>22.2</b> | 2.5             | 0.0    | <b>2.5</b>  |
| <i>fTEQ_du-ssAlk</i>              | 0.21        | 0.00   | <b>0.21</b>  | 14.9                           | 0.0    | <b>14.9</b>  | 2.0                            | 0.0    | <b>2.0</b>  | 16.9                             | 0.0    | <b>16.9</b>  | 16.9                             | 0.0    | <b>16.9</b> | 2.3             | 0.0    | <b>2.3</b>  |
| <i>HYB_duUPTK</i>                 | 0.21        | 0.00   | <b>0.21</b>  | 14.3                           | 0.0    | <b>14.3</b>  | 1.9                            | 0.0    | <b>1.9</b>  | 16.2                             | 0.0    | <b>16.2</b>  | 16.2                             | 0.0    | <b>16.2</b> | 2.3             | 0.0    | <b>2.3</b>  |
| <i>HYB_du-ssUPTK</i>              | 0.20        | 0.00   | <b>0.20</b>  | 13.2                           | 0.0    | <b>13.2</b>  | 1.7                            | 0.0    | <b>1.7</b>  | 15.0                             | 0.0    | <b>15.0</b>  | 15.0                             | 0.0    | <b>15.0</b> | 2.4             | 0.0    | <b>2.4</b>  |
| <i>HYB_gDU=0.1</i>                | 0.19        | 0.00   | <b>0.19</b>  | 12.9                           | 0.0    | <b>12.9</b>  | 1.6                            | 0.0    | <b>1.6</b>  | 14.5                             | 0.0    | <b>14.5</b>  | 14.5                             | 0.0    | <b>14.5</b> | 2.4             | 0.0    | <b>2.4</b>  |
| <i>HYB_DL</i>                     | 0.19        | 0.00   | <b>0.19</b>  | 11.7                           | 0.0    | <b>11.7</b>  | 1.6                            | 0.0    | <b>1.6</b>  | 13.3                             | 0.0    | <b>13.3</b>  | 13.3                             | 0.0    | <b>13.3</b> | 2.7             | 0.0    | <b>2.7</b>  |
| <i>DBCELL_noAlk</i>               | 0.29        | 0.01   | <b>0.30</b>  | 17.8                           | 0.3    | <b>18.1</b>  | 2.8                            | 0.2    | <b>2.9</b>  | 20.5                             | 0.5    | <b>21.0</b>  | 20.5                             | 0.5    | <b>21.0</b> | 2.6             | 3.1    | <b>2.6</b>  |
| <i>DBCELL_duAlk</i>               | 0.30        | 0.01   | <b>0.31</b>  | 18.9                           | 0.3    | <b>19.2</b>  | 3.1                            | 0.2    | <b>3.3</b>  | 22.1                             | 0.4    | <b>22.5</b>  | 22.1                             | 0.4    | <b>22.5</b> | 2.5             | 4.1    | <b>2.5</b>  |
| <i>DBCELL_du-ssAlk</i>            | 0.20        | 0.02   | <b>0.22</b>  | 12.6                           | 0.2    | <b>12.7</b>  | 1.8                            | 0.1    | <b>1.9</b>  | 14.3                             | 0.3    | <b>14.6</b>  | 14.3                             | 0.3    | <b>14.6</b> | 2.6             | 10.8   | <b>2.8</b>  |
| <i>DBCELL_ClaqAlk</i>             | 0.22        | 0.02   | <b>0.23</b>  | 12.9                           | 0.2    | <b>13.1</b>  | 1.8                            | 0.2    | <b>2.0</b>  | 14.7                             | 0.4    | <b>15.1</b>  | 14.7                             | 0.4    | <b>15.1</b> | 2.7             | 7.7    | <b>2.8</b>  |
| <i>AeroCom</i>                    | -           | -      | <b>0.32</b>  | -                              | -      | <b>24.4</b>  | -                              | -      | <b>5.8</b>  | -                                | -      | <b>30.2</b>  | -                                | -      | <b>30.4</b> | -               | -      | <b>4.3</b>  |
| <i>STD AeroCom</i>                | -           | -      | <b>±0.20</b> | -                              | -      | <b>±10.0</b> | -                              | -      | <b>±5.8</b> | -                                | -      | <b>±15.8</b> | -                                | -      | <b>±4.3</b> | -               | -      | <b>±2.6</b> |
| <i>GMI</i>                        | -           | -      | <b>0.48</b>  | -                              | -      | <b>50.7</b>  | -                              | -      | <b>1.9</b>  | -                                | -      | <b>52.6</b>  | -                                | -      | <b>53.0</b> | -               | -      | <b>3.4</b>  |
| <i>EMAC 2008<sup>1</sup></i>      | -           | -      | <b>0.19</b>  | -                              | -      | <b>44.5</b>  | -                              | -      | <b>3.6</b>  | -                                | -      | <b>48.1</b>  | -                                | -      | -           | -               | -      | -           |
| <i>EMAC 2005-2008<sup>2</sup></i> | -           | -      | <b>0.17</b>  | -                              | -      | -            | -                              | -      | -           | -                                | -      | -            | -                                | -      | -           | -               | -      | -           |
| <i>IFS<sup>3</sup></i>            | -           | -      | <b>0.15</b>  | -                              | -      | <b>17.4</b>  | -                              | -      | <b>1.4</b>  | -                                | -      | <b>18.8</b>  | -                                | -      | <b>18.6</b> | -               | -      | <b>2.9</b>  |
| <i>LMDz-INCA</i>                  | -           | -      | <b>0.28</b>  | -                              | -      | <b>19.2</b>  | -                              | -      | <b>3.2</b>  | -                                | -      | <b>22.4</b>  | -                                | -      | <b>22.4</b> | -               | -      | <b>4.5</b>  |
| <i>MetOffice UM<sup>4</sup></i>   | -           | -      | <b>0.54</b>  | -                              | -      | <b>32.1</b>  | -                              | -      | <b>7.4</b>  | -                                | -      | <b>32.1</b>  | -                                | -      | <b>39.2</b> | -               | -      | <b>5.0</b>  |

1. From Bian et al. (2017).

2. From Karydis et al. (2016).

3. Fine  $\text{NO}_3^-$  reported from neutralization of nitric acid, ammonia and sulfate. Coarse nitrate from heterogeneous chemistry (Rémy et al., 2022).

4. Jones et al. (2021) performs two sensitivity tests to the accommodation coefficient used for  $\text{NO}_3^-$  formation in the fine mode: *FAST* with 0.193 and *SLOW* with 0.001. Here, results from the *FAST* test are reported on the basis that they present similar fine  $\text{NO}_3^-$  formation rates to our average fine nitrate results

**Table S12.** Results for particle  $\text{SO}_4^{2-}$  obtained with the studied heterogeneous chemistry mechanisms. Results from the references are reported at the end of the Table: the average of all the participating models in the intercomparison AeroCom phase III nitrate experiment for 2008, specifying their standard deviation (*STD*), and results from the GMI model (using a similar HYB approach with UPTK reactions on dust and SS) and the EMAC model (*EMAC 2008*, that uses a similar approach to DBCELL\_du-ssAlk). Also using the EMAC model, results obtained by the Karydis et al. (2016) study are reported as *EMAC 2005-2008*. Results from models using a similar approach to HYB\_du-ssUPTK are reported as *IFS* for Rémy et al. (2022), *LMDz-INCA* for Hauglustaine et al. (2014) and *MetOffice UM* for Jones et al. (2021).

| Experiment                  | SO4 Emissions (Tg.y-1) |        | SO2 Emissions (Tg.y-1) |        | SO4 Burden (Tg) |       | SO4 Wet Dep. (Tg.y-1) |        | SO4 Dry Dep. (Tg.y-1) |      | SO4 Total Dep. (Tg.y-1) |        | SO4 Production (Tg.y-1) |        | SO4 Lifetime (days) |       |        |       |     |
|-----------------------------|------------------------|--------|------------------------|--------|-----------------|-------|-----------------------|--------|-----------------------|------|-------------------------|--------|-------------------------|--------|---------------------|-------|--------|-------|-----|
|                             | Fine                   | Coarse | Total                  | Fine   | Coarse          | Total | Fine                  | Coarse | Total                 | Fine | Coarse                  | Total  | Fine                    | Coarse | Total               | Fine  | Coarse | Total |     |
| noHC                        | 0.5                    | 0.0    | 104.4                  | 4.4E-3 | 0.00            | 0.00  | 0.5                   | 0.0    | 0.5                   | 0.1  | 0.0                     | 0.1    | 0.5                     | 0.0    | 0.5                 | 0.0   | 0.0    | 0.0   | 3.0 |
| fTEQ_noAlk                  | 0.5                    | 0.0    | 104.4                  | 1.98   | 0.00            | 1.98  | 126.9                 | 0.0    | 126.9                 | 13.5 | 0.0                     | 13.5   | 140.5                   | 0.0    | 140.5               | 139.9 | 0.0    | 139.9 | 2.6 |
| fTEQ_du-ssAlk               | 0.5                    | 0.0    | 104.4                  | 1.82   | 0.14            | 1.96  | 116.7                 | 6.9    | 123.6                 | 13.0 | 3.5                     | 16.5   | 129.7                   | 10.4   | 140.1               | 129.1 | 10.4   | 139.5 | 2.6 |
| HYB_duUPTK                  | 0.5                    | 0.0    | 104.4                  | 1.82   | 0.14            | 1.96  | 116.5                 | 7.0    | 123.5                 | 13.0 | 3.5                     | 16.4   | 129.4                   | 10.5   | 139.9               | 128.9 | 10.5   | 139.3 | 2.6 |
| HYB_du-ssUPTK               | 0.5                    | 0.0    | 104.4                  | 1.85   | 0.14            | 1.98  | 116.4                 | 7.1    | 123.5                 | 12.9 | 3.5                     | 16.4   | 129.3                   | 10.6   | 139.9               | 128.7 | 10.6   | 139.3 | 2.6 |
| HYB_gDU=0.1                 | 0.5                    | 0.0    | 104.4                  | 1.87   | 0.12            | 1.99  | 117.8                 | 6.1    | 124.0                 | 12.7 | 2.9                     | 15.7   | 130.6                   | 9.1    | 139.7               | 130.0 | 9.0    | 139.1 | 2.6 |
| HYB_DL                      | 0.5                    | 0.0    | 104.4                  | 1.85   | 0.14            | 1.99  | 116.4                 | 7.1    | 123.5                 | 12.9 | 3.5                     | 16.4   | 129.3                   | 10.6   | 139.9               | 128.7 | 10.6   | 139.3 | 2.6 |
| DBCELL_noAlk                | 0.5                    | 0.0    | 104.4                  | 1.94   | 0.04            | 1.98  | 124.4                 | 2.0    | 126.4                 | 13.2 | 0.9                     | 14.0   | 137.6                   | 2.9    | 140.5               | 137.0 | 2.9    | 139.9 | 2.6 |
| DBCELL_duAlk                | 0.5                    | 0.0    | 104.4                  | 1.78   | 0.16            | 1.94  | 114.8                 | 8.4    | 123.1                 | 12.7 | 4.1                     | 16.8   | 127.5                   | 12.4   | 139.9               | 126.9 | 12.4   | 139.3 | 2.6 |
| DBCELL_du-ssAlk             | 0.5                    | 0.0    | 104.4                  | 1.76   | 0.20            | 1.96  | 114.9                 | 8.3    | 123.2                 | 12.7 | 4.1                     | 16.8   | 127.6                   | 12.4   | 140.0               | 127.1 | 12.3   | 139.4 | 2.5 |
| DBCELL_ClaqAlk              | 0.5                    | 0.0    | 104.4                  | 1.84   | 0.13            | 1.97  | 117.0                 | 6.9    | 123.8                 | 12.8 | 3.3                     | 16.1   | 129.8                   | 10.1   | 139.9               | 129.2 | 10.1   | 139.3 | 2.6 |
| AeroCom                     | -                      | -      | 122.0                  | -      | -               | 1.80  | -                     | -      | 140.0                 | -    | -                       | 14.3   | -                       | -      | 154.3               | -     | -      | 151.0 | -   |
| STD AeroCom                 | -                      | -      | ±12.0                  | -      | -               | ±0.81 | -                     | -      | ±65.3                 | -    | -                       | ±163.3 | -                       | -      | ±228.6              | -     | -      | ±56.0 | -   |
| GMI                         | -                      | -      | 122.0                  | -      | -               | 3.30  | -                     | -      | 140.0                 | -    | -                       | 14.3   | -                       | -      | 154.3               | -     | -      | 151.0 | -   |
| EMAC 2008 <sup>1</sup>      | -                      | -      | 138.0                  | -      | -               | 1.90  | -                     | -      | 302.0                 | -    | -                       | 504.0  | -                       | -      | 806.0               | -     | -      | 187.0 | -   |
| EMAC 2005-2008 <sup>2</sup> | -                      | -      | -                      | -      | -               | 1.78  | -                     | -      | -                     | -    | -                       | -      | -                       | -      | -                   | -     | -      | -     | -   |
| IFS <sup>3</sup>            | -                      | -      | 70.3                   | -      | -               | 0.367 | -                     | -      | 39.7                  | -    | -                       | 1.9    | -                       | -      | 39.7                | -     | -      | 41.4  | -   |
| LMDz-INCA                   | -                      | -      | -                      | -      | -               | 1.26  | -                     | -      | -                     | -    | -                       | -      | -                       | -      | -                   | -     | -      | -     | -   |
| MetOffice UM <sup>4</sup>   | -                      | -      | -                      | -      | -               | -     | -                     | -      | -                     | -    | -                       | -      | -                       | -      | -                   | -     | -      | -     | -   |

1. From Bian et al. (2017).

2. From Karydis et al. (2016).

3. Fine  $\text{NO}_3^-$  reported from neutralization of nitric acid, ammonia and sulfate. Coarse nitrate from heterogeneous chemistry (Rémy et al., 2022).

4. Jones et al. (2021) performs two sensitivity tests to the accommodation coefficient used for  $\text{NO}_3^-$  formation in the fine mode: *FAST* with 0.193 and *SLOW* with 0.001. Here, results from the *FAST* test are reported on the basis that they present similar fine  $\text{NO}_3^-$  formation rates to our average fine nitrate results

**Table S13.** Nitrogen burdens (TgN) for each experiment and species.

| Nitrogen burdens                                                                   | fTEQ        |             | HYB         |             | HYB         |             | HYB         |             | HYB         |             | DBCLL       |             | DBCLL       |             |
|------------------------------------------------------------------------------------|-------------|-------------|-------------|-------------|-------------|-------------|-------------|-------------|-------------|-------------|-------------|-------------|-------------|-------------|
|                                                                                    | noHC        | noAlk       | du-ssAlk    | duUPTK      | du-ssUPTK   | gDU=0.1     | DL          | noAlk       | duAlk       | du-ssAlk    | noAlk       | duAlk       | du-ssAlk    | ClaqAlk     |
| HNO <sub>3(g)</sub>                                                                | 1.06        | 1.11        | 0.65        | 0.44        | 0.15        | 0.1         | 0.16        | 1.14        | 0.6         | 0.56        | 1.14        | 0.6         | 0.56        | 0.57        |
| NH <sub>3(g)</sub>                                                                 | 0.71        | 0.04        | 0.13        | 0.17        | 0.21        | 0.23        | 0.31        | 0.05        | 0.11        | 0.28        | 0.05        | 0.11        | 0.28        | 0.25        |
| NO <sub>(g)</sub>                                                                  | 0.14        | 0.18        | 0.14        | 0.13        | 0.11        | 0.1         | 0.11        | 0.19        | 0.14        | 0.14        | 0.19        | 0.14        | 0.14        | 0.14        |
| NO <sub>2(g)</sub>                                                                 | 0.24        | 0.27        | 0.22        | 0.2         | 0.17        | 0.17        | 0.17        | 0.28        | 0.22        | 0.22        | 0.28        | 0.22        | 0.22        | 0.22        |
| N <sub>2</sub> O <sub>5(g)</sub>                                                   | 0.04        | 0.03        | 0.02        | 0.02        | 0.01        | 0.01        | 0.01        | 0.03        | 0.02        | 0.02        | 0.03        | 0.02        | 0.02        | 0.02        |
| NTR <sub>(g)</sub>                                                                 | 0.44        | 0.47        | 0.48        | 0.48        | 0.47        | 0.47        | 0.47        | 0.47        | 0.47        | 0.48        | 0.47        | 0.47        | 0.48        | 0.48        |
| PNA <sub>(g)</sub>                                                                 | 0.04        | 0.03        | 0.02        | 0.02        | 0.02        | 0.02        | 0.02        | 0.03        | 0.02        | 0.02        | 0.03        | 0.02        | 0.02        | 0.02        |
| PAN <sub>(g)</sub>                                                                 | 0.8         | 0.64        | 0.53        | 0.49        | 0.42        | 0.41        | 0.42        | 0.65        | 0.52        | 0.52        | 0.65        | 0.52        | 0.52        | 0.52        |
| PAN <sub>x(g)</sub>                                                                | 0.16        | 0.13        | 0.11        | 0.11        | 0.09        | 0.09        | 0.09        | 0.14        | 0.11        | 0.11        | 0.14        | 0.11        | 0.11        | 0.11        |
| PM <sub>2.5</sub> NO <sub>3(aer)</sub>                                             | 0           | 0.02        | 0.15        | 0.13        | 0.12        | 0.11        | 0.09        | 0.01        | 0.22        | 0.06        | 0.01        | 0.22        | 0.06        | 0.09        |
| PM <sub>2.5-10</sub> NO <sub>3(aer)</sub>                                          | 0           | 0           | 0           | 0.13        | 0.27        | 0.32        | 0.29        | 0           | 0.11        | 0.18        | 0           | 0.11        | 0.18        | 0.14        |
| PM <sub>2.5</sub> NH <sub>4(aer)</sub>                                             | 0           | 0.23        | 0.17        | 0.16        | 0.15        | 0.15        | 0.15        | 0.22        | 0.24        | 0.16        | 0.22        | 0.24        | 0.16        | 0.17        |
| PM <sub>2.5-10</sub> NH <sub>4(aer)</sub>                                          | 0           | 0           | 0           | 0           | 0           | 0           | 0           | 0.01        | 0.01        | 0.01        | 0.01        | 0.01        | 0.01        | 0.01        |
| NO <sub>(g)</sub> + NO <sub>2(g)</sub> + NO <sub>3(g)</sub>                        | <b>0.39</b> | <b>0.46</b> | <b>0.36</b> | <b>0.33</b> | <b>0.28</b> | <b>0.28</b> | <b>0.28</b> | <b>0.47</b> | <b>0.37</b> | <b>0.36</b> | <b>0.47</b> | <b>0.37</b> | <b>0.36</b> | <b>0.36</b> |
| NTR <sub>(g)</sub> + PNA <sub>(g)</sub> + PAN <sub>(g)</sub> + PAN <sub>x(g)</sub> | <b>1.44</b> | <b>1.28</b> | <b>1.14</b> | <b>1.09</b> | <b>1.01</b> | <b>0.99</b> | <b>1</b>    | <b>1.29</b> | <b>1.13</b> | <b>1.13</b> | <b>1.29</b> | <b>1.13</b> | <b>1.13</b> | <b>1.13</b> |
| <b>Aerosol nitrate + ammonium</b>                                                  | <b>0</b>    | <b>0.25</b> | <b>0.31</b> | <b>0.42</b> | <b>0.55</b> | <b>0.58</b> | <b>0.53</b> | <b>0.24</b> | <b>0.57</b> | <b>0.41</b> | <b>0.24</b> | <b>0.57</b> | <b>0.41</b> | <b>0.42</b> |
| <b>Total nitrogen</b>                                                              | <b>3.63</b> | <b>3.15</b> | <b>2.62</b> | <b>2.48</b> | <b>2.19</b> | <b>2.18</b> | <b>2.29</b> | <b>3.22</b> | <b>2.79</b> | <b>2.76</b> | <b>3.22</b> | <b>2.79</b> | <b>2.76</b> | <b>2.74</b> |

## References

- Bian, H., Chin, M., Hauglustaine, D. A., Schulz, M., Myhre, G., Bauer, S. E., Lund, M. T., Karydis, V. A., Kucsera, T. L., Pan, X., Pozzer, A., Skeie, R. B., Steenrod, S. D., Sudo, K., Tsigaridis, K., Tsimpidi, A. P., and Tsyro, S. G.: Investigation of global particulate nitrate from the AeroCom phase III experiment, *Atmospheric Chemistry and Physics*, 17, 12 911–12 940, <https://doi.org/10.5194/acp-17-12911-2017>, 2017.
- Bleam, W.: *Clay Mineralogy and Chemistry*, Soil and Environmental Chemistry, pp. 87–146, <https://doi.org/10.1016/B978-0-12-804178-9.00003-3>, 2017.
- Blum, A. E.: *Feldspars in Weathering*, pp. 595–630, Springer Netherlands, Dordrecht, [https://doi.org/10.1007/978-94-011-1106-5\\_15](https://doi.org/10.1007/978-94-011-1106-5_15), 1994.
- Britannica, The Editors of Encyclopaedia: chlorite, <https://www.britannica.com/science/chlorite-mineral>, [Online; accessed March 11, 2024], 2018.
- Claquin, T., Schulz, M., and Balkanski, Y. J.: Modeling the mineralogy of atmospheric dust sources, *Journal of Geophysical Research: Atmospheres*, 104, 22 243–22 256, <https://doi.org/10.1029/1999JD900416>, 1999.
- Essington, M. E., Nelson, J. B., and Holden, W. L.: Gibbsite and Goethite Solubility, *Soil Science Society of America Journal*, 69, 996–1008, <https://doi.org/10.2136/SSSAJ2004.0287>, 2005.
- Hauglustaine, D. A., Balkanski, Y., and Schulz, M.: A global model simulation of present and future nitrate aerosols and their direct radiative forcing of climate, *Atmospheric Chemistry and Physics*, 14, 11 031–11 063, <https://doi.org/10.5194/acp-14-11031-2014>, 2014.
- Hodzic, A., Bessagnet, B., and Vautard, R.: A model evaluation of coarse-mode nitrate heterogeneous formation on dust particles, *Atmospheric Environment*, 40, 4158–4171, <https://doi.org/10.1016/j.atmosenv.2006.02.015>, 2006.
- Huggett, J.: *Clay Minerals*, Reference Module in Earth Systems and Environmental Sciences, <https://doi.org/10.1016/B978-0-12-409548-9.09519-1>, 2015.
- Hulett, G. A. and Allen, L. E.: The solubility of gypsum, *Journal of the American Chemical Society*, 24, 667–679, [https://doi.org/10.1021/JA02021A007/ASSET/JA02021A007.FP.PNG\\_V03](https://doi.org/10.1021/JA02021A007/ASSET/JA02021A007.FP.PNG_V03), 1902.
- Jones, A. C., Hill, A., Remy, S., Abraham, N. L., Dalvi, M., Hardacre, C., Hewitt, A. J., Johnson, B., Mulcahy, J. P., and Turnock, S. T.: Exploring the sensitivity of atmospheric nitrate concentrations to nitric acid uptake rate using the Met Office ’ s Unified Model, *Atmospheric Chemistry and Physics*, 21, 1–48, <https://doi.org/10.5194/acp-21-15901-2021>, 2021.
- Karydis, V. A., Tsimpidi, A. P., Pozzer, A., Astitha, M., and Lelieveld, J.: Effects of mineral dust on global atmospheric nitrate concentrations, *Atmospheric Chemistry and Physics*, 16, 1491–1509, <https://doi.org/10.5194/acp-16-1491-2016>, 2016.
- Krueger, B. J., Grassian, V. H., Cowin, J. P., and Laskin, A.: Heterogeneous chemistry of individual mineral dust particles from different dust source regions: The importance of particle mineralogy, *Atmospheric Environment*, 38, 6253–6261, <https://doi.org/10.1016/j.atmosenv.2004.07.010>, 2004.
- Mindat.org: Chlorite Group, <https://www.Mindat.org/min-1016.html>, [Online; accessed March 11, 2024], a.
- Mindat.org: Feldspar Group, <https://www.Mindat.org/min-1624.html>, [Online; accessed March 11, 2024], b.
- National Center for Biotechnology Information: PubChem Compound Summary for CID 14833, Hematite, <https://pubchem.ncbi.nlm.nih.gov/compound/Hematite>, [Online; accessed January 24, 2024], 2024a.
- National Center for Biotechnology Information: PubChem Compound Summary for CID 92027383, Muscovite, <https://pubchem.ncbi.nlm.nih.gov/compound/Muscovite>, [Online; accessed January 24, 2024], 2024b.

- National Center for Biotechnology Information. PubChem Compound Database: PubChem Compound Summary for CID 24928, Calcium Sulfate Dihydrate, <https://pubchem.ncbi.nlm.nih.gov/compound/Calcium-Sulfate-Dihydrate>, [Online; accessed January 24, 2024], 2024a.
- National Center for Biotechnology Information. PubChem Compound Database: PubChem Compound Summary for CID 91502, Goethite (Fe(OH)O), <https://pubchem.ncbi.nlm.nih.gov/compound/Goethite-Fe-OH-O>, [Online; accessed January 24, 2024], 2024b.
- 50 Nutting, P.: The solution and colloidal dispersion of minerals in water on JSTOR, Washington Academy of Sciences, 22, 261–267, <https://www.jstor.org/stable/24522222>, 1932.
- Nutting, P. G.: THE ACTION OF SOME AQUEOUS SOLUTIONS ON CLAYS OF THE MONTMORILLONITE GROUP, UNITED STATES DEPARTMENT OF THE INTERIOR, pp. 219–235, 1941.
- 55 Rémy, S., Kipling, Z., Huijnen, V., Flemming, J., Nabat, P., Michou, M., Ades, M., Engelen, R., and Peuch, V. H.: Description and evaluation of the tropospheric aerosol scheme in the Integrated Forecasting System (IFS-AER, cycle 47R1) of ECMWF, Geoscientific Model Development, 15, 4881–4912, <https://doi.org/10.5194/gmd-15-4881-2022>, 2022.
- Schulze, D. G.: CLAY MINERALS, Encyclopedia of Soils in the Environment, 4, 246–254, <https://doi.org/10.1016/B0-12-348530-4/00189-2>, 2005.
- 60 Usher, C. R., Michel, A. E., and Grassian, V. H.: Reactions on Mineral Dust, Chemical Reviews, 103, 4883–4939, <https://doi.org/10.1021/cr020657y>, 2003.
- Weast, R. C.: CRC Handbook of Chemistry and Physics, Cronus Books, 60 edn., [https://www.abebooks.com/servlet/BookDetailsPL?bi=31210018960&searchurl=an%3Dweast%2Brobort%26sortby%3D17%26tn%3Dcrc%2Bhandbook%2Bchemistry%2Bphysics%2B60th&cm\\_sp=snippet-\\_-srp1-\\_-title1](https://www.abebooks.com/servlet/BookDetailsPL?bi=31210018960&searchurl=an%3Dweast%2Brobort%26sortby%3D17%26tn%3Dcrc%2Bhandbook%2Bchemistry%2Bphysics%2B60th&cm_sp=snippet-_-srp1-_-title1), 1980.
- 65 Webmineral: Albite Mineral Data, <http://webmineral.com/data/Albite.shtml>, [Online; accessed 11 March 2024], 2008a.
- Webmineral: Anorthite Mineral Data, <http://webmineral.com/data/Anorthite.shtml>, [Online; accessed 11 March 2024], 2008b.
- Webmineral: Calcite Mineral Data, <http://webmineral.com/data/Calcite.shtml>, [Online; accessed 11 March 2024], 2008c.
- Webmineral: Gypsum Mineral Data, <http://webmineral.com/data/Gypsum.shtml>, [Online; accessed 11 March 2024], 2008d.
- Webmineral: Orthoclase Mineral Data, <http://webmineral.com/data/Orthoclase.shtml>, [Online; accessed 11 March 2024], 2008e.
- 70 Webmineral: Illite Mineral Data, <http://webmineral.com/data/Illite.shtml>, [Online; accessed 20 October 2022], 2008f.
- Yang, L.: Title Kaolinite dissolution and precipitation kinetics at 22oC and pH 4 Permalink <https://escholarship.org/uc/item/0qz871kp> Publication Date, <https://escholarship.org/uc/item/0qz871kp>, 2008.
- Zhang, Y. and Muhammed, M.: Solubility of Calcium Sulfate Dihydrate in Nitric Acid Solutions Containing Calcium Nitrate and Phosphoric Acid, Journal of Chemical and Engineering Data, 34, 121–124, <https://doi.org/10.1021/je00055a032>, 1989.
